1                    ***GmSALT3* expression improves reactive oxygen species**  
2                    **detoxification in salt-stressed soybean roots**

3  
4   **Yue Qu<sup>1</sup>, Lili Yu<sup>2</sup>, Rongxia Guan<sup>2</sup>, Oliver Berkowitz<sup>3</sup>, Rakesh David<sup>1</sup>, James Whelan<sup>3</sup>,**  
5   **Melanie Ford<sup>1</sup>, Stefanie Wege<sup>1,\*</sup>, Lijuan Qiu<sup>2,\*</sup>, Matthew Gilliham<sup>1,\*</sup>**

6  
7   <sup>1</sup> ARC Centre of Excellence in Plant Energy Biology, Waite Research Institute & School of  
8   Agriculture, Food and Wine, University of Adelaide, Glen Osmond, SA, Australia

9   <sup>2</sup> The National Key Facility for Crop Gene Resources and Genetic Improvement, Institute of  
10   Crop Science, Chinese Academy of Agricultural Sciences, Beijing, China

11   <sup>3</sup> Department of Animal, Plant and Soil Science, School of Life Science, Australian Research  
12   Council Centre of Excellence in Plant Energy Biology, La Trobe University, Bundoora VIC  
13   3083, Australia

14   \*Correspondence should be addressed to:

15   Prof. Matthew Gilliham ([matthew.gilliham@adelaide.edu.au](mailto:matthew.gilliham@adelaide.edu.au))

16   Prof. Lijuan Qiu ([qiulijuan@caas.cn](mailto:qiulijuan@caas.cn))

17   Dr. Stefanie Wege ([stefanie.wege@adelaide.edu.au](mailto:stefanie.wege@adelaide.edu.au))

18   Tel: +61 8 8313 8145

19   The date of submission:

20   The number of tables: 5

21   The number of Figure: 6

22   Word count: 4645

23   Supplementary data: 9 Figures and 1 Table

24   **Running title: *GmSALT3*, ROS and salt-tolerance soybean**

25 **Highlight**

26 RNA-seq analysis revealed that GmSALT3, which confers improved salt tolerance on  
27 soybean, improves reactive oxygen species detoxification in roots.

28

29 **Abstract**

30 Soybean plants are salinity (NaCl) sensitive, with their yield significantly decreased  
31 under moderately saline conditions. *GmSALT3* is the dominant gene underlying a major QTL  
32 for salt tolerance in soybean. *GmSALT3* encodes a transmembrane protein belonging to the  
33 plant cation/proton exchanger (CHX) family. It is currently unknown through which  
34 molecular mechanism(s) the ER-localised GmSALT3 contributes to salinity tolerance, as its  
35 localisation excludes direct involvement in ion exclusion. In order to gain insights into  
36 potential molecular mechanism(s), we used RNA-seq analysis of roots from two soybean  
37 NILs (Near Isogenic Lines); NIL-S (salt-sensitive, *Gmsalt3*) and NIL-T (salt-tolerant,  
38 *GmSALT3*), grown under control and saline conditions (200 mM NaCl) at three time points  
39 (0h, 6h, and 3 days). Gene ontology (GO) analysis showed that NIL-T has greater responses  
40 aligned to oxidation reduction. ROS were shown less abundant and scavenging enzyme  
41 activity was higher in NIL-T, consistent with the RNA-seq data. Further analysis indicated  
42 that genes related to calcium signalling, vesicle trafficking and Casparian strip (CS)  
43 development were upregulated in NIL-T following salt treatment. We propose that  
44 GmSALT3 improves the ability of NIL-T to cope with saline stress through preventing ROS  
45 overaccumulation in roots, and potentially modulating Ca<sup>2+</sup> signalling, vesicle trafficking and  
46 formation of diffusion barriers.

47

48 **Keywords:** ROS; salinity tolerance; endomembrane; CPA2; *GmSALT3*; *GmCHX1*; *GmNcl*

49

## 50 Introduction

51 Plants use reactive oxygen species (ROS) as signalling molecules at low  
52 concentrations to control and regulate various biological processes, such as growth,  
53 programmed cell death, hormone signalling and development (Pei *et al.*, 2000; Mittler, 2002;  
54 Neill *et al.*; 2002, Foreman *et al.*, 2003; Overmyer *et al.*, 2003). However, ROS are also a  
55 toxic by-product of many reactions, which subsequently need to be eliminated by ROS  
56 scavenging enzymes. Under non-stressed conditions, the production of ROS and the capacity  
57 of the cell to scavenge them are generally at equilibrium (Foyer and Noctor, 2005). However,  
58 under biotic and abiotic stresses such as salinity, drought, temperature extremes, flooding,  
59 heavy metals, nutrient deprivation, and pathogen attack, intracellular ROS levels can increase  
60 dramatically. ROS at high concentrations damage plant cells through lipid peroxidation,  
61 DNA damage, protein denaturation, carbohydrate oxidation, and enzymatic activity  
62 impairment leading to significant damage to cellular functions and even cell death (Noctor  
63 and Foyer, 1998; Mittler *et al.*, 2004; Foyer and Noctor, 2005; Gill and Tuteja, 2010). ROS  
64 damage due to environmental stress is therefore a leading factor contributing to reduced  
65 global crop production. ROS have, for example, detrimental effects on membrane integrity  
66 under drought stress and cause early senescence, lowering crop yield (Mittler, 2002; Sharma  
67 *et al.*, 2017). In plants, ROS are eliminated through enzymatic and non-enzymatic pathways.  
68 Enzymatic antioxidant systems include scavenger enzymes such as SOD (superoxide  
69 dismutase), APX (ascorbate peroxidase), GPX (Glutathione peroxidases), PrxR  
70 (proxiredoxin), GST (glutathione-S- transferase), and CAT (Catalase); while non-enzymatic  
71 pathways include low molecular metabolites, such as ASH (ascorbate), GSH (glutathione),  
72 proline,  $\alpha$ -tocopherol (vitamin E), carotenoids and flavonoids (Mittler *et al.*, 2004; Feroza *et*  
73 *al.*, 2016).

74           Among the above-mentioned stresses, salinity is one of the most prominent factors  
75   restricting crop production and agricultural economic growth worldwide. More than US\$12  
76   billion in revenue is estimated to be lost annually because of saline-affected agricultural land  
77   areas (Flowers *et al.*, 2010; Bose *et al.*, 2014; Gilliham *et al.*, 2017). Soybean (*Glycine max*  
78   (L.) Merrill) is an important legume crop that contributes 30% of the total vegetable oil  
79   consumed and 69% of human food and animal feed protein-rich supplements (Prakash, 2001;  
80   Lam *et al.*, 2010). The yield of soybean can be significantly reduced by salinity stress,  
81   especially during the early vegetative growth stage (Pi *et al.*, 2016).

82           In soybean, *GmSALT3* (also known as *GmCHX1* and *GmNcl*) has been identified as a  
83   dominant gene that confers improved salinity tolerance (Guan *et al.*, 2014; Qi *et al.*, 2014, Do  
84   *et al.*, 2016). It is mainly expressed in root phloem- and xylem-associated cells and the  
85   protein is localized to the ER (endoplasmic reticulum), not the plasma membrane (PM)  
86   (Guan *et al.*, 2014). NILs (near isogenic lines), differing only in a transposon insertion in the  
87   *GmSALT3* gene, show that *GmSALT3* is involved in shoot exclusion of both, Na<sup>+</sup> (sodium)  
88   and Cl<sup>-</sup> (chloride). In NIL-Ts with a functional *GmSALT3*, leaf Cl<sup>-</sup> exclusion can be  
89   observed prior to Na<sup>+</sup> exclusion (Liu *et al.*, 2016), suggesting two distinct mechanisms for the  
90   exclusion of the two ions. Grafting of NILs showed that shoot Na<sup>+</sup> exclusion occurs via a root  
91   xylem-based mechanism and shoot Cl<sup>-</sup> exclusion likely depends upon novel phloem-based  
92   Cl<sup>-</sup> recirculation (Qu *et al.*, 2021). Additionally, *GmSALT3* is also related to K<sup>+</sup> homeostasis  
93   (Do *et al.*, 2016; Qu *et al.*, 2021). Despite the known importance of *GmSALT3* for soybean  
94   salinity tolerance, the molecular mechanism through which the ER-localised *GmSALT3*  
95   contributes to improved salinity stress tolerance has not yet been revealed.

96           There are studies providing a basis for examining the general responses of soybean  
97   roots to salt stress, however, these studies compared genetically diverse soybeans that differ  
98   in many aspects. High-throughput “-omics” technologies, including transcriptomics,

99 proteomics, and metabolomics have been applied in an attempt to understand soybean root  
100 responses to salinity stress (Aghaei *et al.*, 2009; Toorchi *et al.*, 2009; Ge *et al.*, 2010; Lu *et al.*,  
101 2013; Qin *et al.*, 2013; Pi *et al.*, 2016). For instance, proteomic studies utilising the *Glycine*  
102 *max* cultivar Wenfeng07 (relatively salt-tolerant) and the *Glycine soja* (wild soybean) cultivar  
103 Union85-140 (relatively salt-sensitive), suggested that Wenfeng07's tolerance to salinity  
104 stress was associated with flavonoid accumulation in the tolerant accession. Flavonoids  
105 belong to the metabolites that scavenge ROS, and flavonoid synthesis is dependent on the  
106 activity of a few key enzymes, including chalcone synthase (CHS), chalcone isomerase (CHI)  
107 and cytochrome P450 monooxygenase (CPM) (Pi *et al.*, 2016). Wenfeng07 contains the  
108 *GmSALT3* salt tolerant allele and it is absent in Union85-140, but an explicit link between  
109 ROS detoxification, *GmSALT3* and salt tolerance is not possible in this diverse genetic  
110 material.

111 We took advantage of our previously isolated NILs, and performed RNA-sequencing  
112 of NIL-T (salt-tolerant, *GmSALT3*) and NIL-S (salt-sensitive, *Gmsalt3*) roots, to further  
113 investigate the mechanism by which *GmSALT3* confers salinity tolerance. Genes connected  
114 to ROS signalling were significantly differently regulated in NIL-T compared to NIL-S under  
115 saline conditions, suggesting a direct connection of ROS production to *GmSALT3*.  
116 Enzymatic assays further revealed that presence of *GmSALT3* is essential for maintaining  
117 ROS homeostasis under saline conditions. Differential gene expression under control  
118 conditions suggested that NIL-S might have a higher biotic resistance compared to NIL-T.

119

## 120 [Materials and methods](#)

### 121 *Plant growth conditions and stress treatments*

122 NIL-T (Salt-tolerant, *GmSALT3*) and NIL-S (Salt-sensitive, *Gmsalt3*) plants were  
123 grown in a growth chamber (RXZ-500D; Ningbo Jiangnan Instrument, China), with a day

124 length of 16h (with a light-emitting diode light source at  $400 \mu\text{mol m}^{-2} \text{s}^{-1}$ ) at 28 °C, and 8 h  
125 dark at 25 °C, with 60% relative humidity throughout. Soybean seedlings were treated with  
126 200 mM NaCl (salt treatment) or water (control) at 10 days after sowing (DAS). 200 mM  
127 NaCl or water were applied again at 12 DAS.

128

### 129 *Total RNA extraction and RNA-seq library construction*

130 Total RNA was extracted from soybean roots using TRIZOL reagent (Ambion,  
131 <http://www.ambion.com>). Root samples were harvested at three time points, 0h, 6h, and 3d of  
132 a 200 mM salt-treatment with the corresponding non-treatment controls. To remove the  
133 residual DNA, the extracted RNA was treated with RNase-free DNase I (New England  
134 Biolabs, <https://www.neb.com>) for 30 min at 37°C. Thirty RNA libraries were generated for  
135 paired-end reads using an Illumina HiSeq 2500 sequencer, consisting of 3 biological samples  
136 per time point per genotype.

137

### 138 *RNA-seq data analysis and assembly*

139 Raw reads were generated and mapped to the latest soybean genome sequence  
140 Gmax\_275 Wm82.a2.v1 (Glyma 2.0) using TopHat2 (Kim *et al.*, 2013). Clean mapped reads  
141 were obtained by removing low quality ( $Q < 30$ ) sequences, adapter fragments and barcode  
142 sequences. A quality control test by fastQC (Andrews, 2010) revealed the quality of RNA-  
143 seq libraries construction and sequence alignment were sufficient for further analysis.

144

### 145 *Gene expression level and DEG analysis*

146 Gene expression was compared in FPKMs (Fragments Per Kilobase of transcript per  
147 Million) calculated using the Cufflinks functions cuffquant and cuffnorm (Trapnell *et al.*,  
148 2012). Differential expression analysis of two conditions/groups was performed using the

149 DESeq R package (1.10.1). The resulting P values were adjusted using the Benjamini and  
150 Hochberg's approach for controlling the false discovery rate. The cut-offs for differentially  
151 expressed genes (DEGs) were  $\text{Log}_2\text{FC}$  (fold change)  $\geq 1$ , FDR (False Discover Rate)  $< 0.01$ .

152

### 153 *GO enrichment and KEGG pathway analysis*

154 GO enrichment analysis of DEGs was implemented using AgriGO (Du *et al.*, 2010).  
155 GO terms with corrected  $p$  values  $< 0.05$  were deemed significantly enriched. KEGG  
156 (Kanehisa *et al.*, 2007) is a database resource for understanding high-level functions and  
157 utilities of the biological system, such as the cell, the organism and the ecosystem, from  
158 molecular-level information, especially large-scale molecular datasets generated by genome  
159 sequencing and other high-throughput experimental technologies  
160 (<http://www.genome.jp/kegg/>). We used KOBAS (Mao *et al.*, 2005) software to test the  
161 statistical enrichment of differential expression genes in KEGG pathways.

162

### 163 *Weighted Gene Co-expression Network Analysis (WGCNA)*

164 There were 54,175 genes annotated in all the RNA-seq libraries. After filtering out  
165 non-expressed genes, low-expressed genes (FPKM  $< 2$ ) and genes that possessed large  
166 expression variation across replicates, 28,223 genes were selected for WGCNA analysis. An  
167 unsigned gene co-expression network was built using the WGCNA R-package (Langfelder  
168 and Horvath, 2008). The Topological Overlap Measure (TOM) was calculated using the  
169 adjacency matrix between all genes with a power of 18. A gene dendrogram was created by  
170 using the dissimilarity TOM. Branches of the dendrogram (Supplementary Fig. 6) indicated  
171 modules (clustered highly co-expressed genes) through using the Dynamic Tree Cut  
172 algorithm (Langfelder *et al.*, 2008). Each module has an assigned colour. Similar modules  
173 were merged by calculating module eigengenes. Using the module eigengenes, the Module –

174 Trait Relationships (MTRs) were plotted by calculating the Pearson's correlations between  
175 the module eigengene and the samples (traits). A correlation of 0.75 with at least one of the  
176 selected traits was the criteria used to generate modules. Clustered genes in modules of  
177 interest were then used for further analysis. Genes annotation and GO term analysis were  
178 performed in Soybase (Grant *et al.*, 2010) and AgriGO (Du *et al.*, 2010), respectively.

179

#### 180 *ROS production and contents measurement*

181 Fourteen-day-old NIL-T and NIL-S soybean seedlings were used to measure the  
182 generation of ROS in roots. Roots were labelled with 30  $\mu$ M Dichlorofluorescein diacetate  
183 (DCFDA; Sigma-Aldrich, USA), by incubating washed soybean roots for 10 min at room  
184 temperature in the dark with 30  $\mu$ M DCFDA. ROS sensitive fluorescent dyes were imaged  
185 using a Nikon SMZ25 stereo microscope (Nikon, Japan). The excitation and emission  
186 wavelengths were 488 nm and 500/535 nm, respectively.

187 ROS contents in soybean root samples were measured using Amplex<sup>®</sup> UltraRed  
188 reagent (Invitrogen, USA). Sodium phosphate buffer (0.5 ml 50 mM pH 7.4) was added to  
189 0.1g soybean powder, after mixing and solubilisation, samples were set on ice for 5 min.  
190 Then tubes were centrifuged at 12 x 1000 g for 20 min. 500  $\mu$ l supernatant was transferred  
191 into new tubes. An equal volume of 2:1 (v/v) chloroform : methanol was added and  
192 centrifuged at 12 x 1000 g for 5 min. 50  $\mu$ l aqueous phase was took from each sample and  
193 add into each well of 96-well microplate. 50  $\mu$ l working solution (freshly made) was added  
194 into each well. Plates were incubated at 25 °C for 30 min (protected from light). Fluorescence  
195 was measured at 540/590 nm.

196

#### 197 *Scavenging activity of the superoxide anion ( $O_2^-$ ) assay*



198 The scavenging activity assay was adapted from Pi *et al.* (2016) with slight  
199 modifications. Less root homogenate (0.1 g) was used for measurement. Antioxidant  
200 enzymes were extracted with 2 ml of 0.05 M phosphate buffer (pH5.5) from 0.1 g root  
201 homogenate. The extract was then centrifuged at 12,000 x g (4 °C) for 10 min. Supernatant  
202 (40 µl) was added into 160 µl reaction buffer, which contains 80 µl phosphate buffer, 40 µl  
203 0.05 M guaiacol (Sigma, USA), 40 µl 2% hydrogen peroxide (H<sub>2</sub>O<sub>2</sub>). The increased  
204 absorbance at 470 nm in 96-well plates due to the enzyme-dependent guaiacol oxidation was  
205 recorded every 30s until 4 min of reaction.

206

207 *Real-time quantitative reverse-transcription polymerase chain reaction (RT-qPCR)*

208 *validation for RNA-seq results*

209 Total RNA was extracted from soybean root tissues using TRIZOL reagent (Ambion,  
210 <http://www.ambion.com>). To remove the residual DNA, the extracted RNA was treated with  
211 RNase-free DNase I (New England Biolabs, <https://www.neb.com>) for 30 min at 37°C. For  
212 gene expression, first-strand cDNA synthesis was done with a PrimeScript RT Reagent Kit  
213 (TaKaRa, Japan, <http://www.takara.co.jp/english>). Real-time PCR was performed using  
214 SYBR Premix Ex Taq II (TliRNaseH Plus) (TaKaRa). The level of *GmSALT3* transcript was  
215 normalised using the control gene *GmUKNI* (Hu *et al.*, 2009).

216

## 217 Results

218 *RNA-sequencing preparation and profiles*

219 *GmSALT3* has previously been shown to be expressed in roots, and grafting  
220 experiments have shown that presence of *GmSALT3* expression in roots is sufficient to  
221 confer shoot Na<sup>+</sup> and Cl<sup>-</sup> exclusion (Guan *et al.*, 2014; Qu *et al.*, 2021). Total root RNA was  
222 extracted from NIL-T and NIL-S, and transcriptomes obtained using RNA-seq in a time

223 course from plants grown under control and saline conditions. To investigate short- and long-  
224 term responses, root samples were harvested at three time points, 0h (control), 6h, and 3d  
225 with 200 mM salt-treatment and controls (Fig. 1a; 1b) and in biological triplicates. Thirty  
226 RNA libraries were generated for paired-end reads using an Illumina HiSeq 1500 sequencer.  
227 In total, 1.6 billion paired 100 bp raw reads were generated and mapped to the soybean  
228 genome sequence Gmax\_275 Wm82.a2.v1 (Glyma 2.0) using TopHat2 (Kim *et al.*, 2013).  
229 The average mapping percentage was 81.25%. After trimming of low quality (Q<30), adapter  
230 fragments and barcode sequences, a total of 804 million clean mapped reads were identified.  
231 Combined with a quality control test using fastQC (Andrews, 2010), the quality of RNA-seq  
232 libraries construction and sequence alignment was deemed sufficient for further analysis. A  
233 summary of mapped reads and quality of sequencing is shown in Table 1. Transcripts  
234 corresponding to *GmSALT3/Gmsalt3* in the NIL-T and NIL-S in all samples were confirmed.  
235 NIL-T transcriptomes contained reads across the entire full-length transcript for *GmSALT3*  
236 were obtained, while in NIL-S reads only mapped to the predicted truncated version *Gmsalt3*  
237 (Fig. 1c). A flowchart of data analysis is shown in Fig. 1d.

238

### 239 *Overview of DEGs between NIL-T and NIL-S under control conditions*

240 Previous work had shown that *GmSALT3* is expressed under both control and saline  
241 conditions, suggesting that there might already be a difference in other gene expression  
242 between NIL-T and NIL-S under control conditions. We therefore first compared the  
243 transcriptomes of NIL-T and NIL-S (indicated as “T” and “S”, respectively) under control  
244 conditions, before analysing changes due to salinity treatment. A PCA plot (for the first two  
245 principal components) of ten grouped samples shows a good separation between all  
246 comparisons, confirming replicates clustered together consistently. Those comparisons are:  
247 Control 0h T vs Control 0h S (grey), Control 3d T vs Control 3d S (purple), and Control 6h T

248 vs Control 6h S (brown) (Fig. 2a). There are 5 up-regulated Differentially Expressed Genes  
249 (DEGs) at 0h, 9 up-regulated DEGs at 6h, and 6 up-regulated DEGs at 3d in NIL-S  
250 (compared to NIL-T), and a Venn diagram demonstrates 3 of these genes are common across  
251 three time points. There were 1, 5, and 5 down-regulated DEGs at 0h, 6h, and 3d,  
252 respectively, but the identity of the down-regulated DEGs were different between each of the  
253 time point (Fig. 2b). The three consistently up-regulated DEGs in NIL-S at all time points  
254 under control conditions were *Glyma.07G196800* (Linoleate 13S-lipoxygenase 3-1),  
255 *Glyma.10G143600* (uncharacterized protein), and *Glyma.20G105500* (3-hydroxybenzoate 6-  
256 hydroxylase 1-like) (Fig. 2c). Fig. 2d shows the expression profile (in FPKM, Fragments Per  
257 Kilobase of transcript per Million) of these three genes at all time points of NIL-T and NIL-S  
258 under control conditions.

259

260 *Overview of DEGs in salt treated NIL-T and NIL-S when compared to their respective*  
261 *controls*

262 Transcript abundance was compared in FPKMs calculated using the Cufflinks  
263 functions cuffquant and cuffnorm (Trapnell *et al.*, 2012). DEGs were classified as genes with  
264 a  $\text{Log}_2\text{FC}$  (fold change)  $\geq 1$  and a FDR (False Discover Rate)  $< 0.01$  when comparing  
265 between two conditions. Gene expression differences in response to salt of each genotype  
266 was examined separately; to identify the DEGs in NIL-T and in NIL-S in response to salt.  
267 Using these parameters and comparing control to salt treated NIL-T, we identified 1816  
268 DEGs that were differently expressed in NIL-T roots in response to salt (1263 up-regulated  
269 and 553 down-regulated, 6h T).

270 We then did the same analysis for NIL-S roots, and compared expression of control  
271 and salt treated NIL-S. 6h salt treated NIL-S roots (when compared to control NIL-S) showed  
272 a greater initial response in term of DEGs than we found in NIL-T, with a total of 3054 DEGs

273 (1911 up-regulated and 1143 down-regulated, 6h S) (Fig. 3b). After three days of salt  
274 treatment, the increased number of DEGs in NIL-S was not observed anymore. On the  
275 contrary, the NIL-T now showed a slightly higher number of DEGs compared to control  
276 conditions. Now, the NIL-T had 2844 DEGs (1333 up-regulated and 1511 down-regulated,  
277 3d T) while there were 2573 DEGs (1318 up-regulated and 1255 down-regulated, 3d S) in  
278 NIL-S roots (Fig. 3b).

279 Hierarchical clustering of the DEGs of the three replicates in different grouped  
280 samples is shown in Fig. 3c-f. These DEGs represent the genes that each soybean line up- or  
281 downregulates in response to salt. We then used the hierarchical clustering to identify DEGs,  
282 which either similarly change in expression in the two genotypes in response to salt, and  
283 which genes show a different change in expression comparing the two genotypes. Analyses  
284 of the similarities and differences between the tolerant and sensitive lines indicated that 341  
285 and 989 DEGs are uniquely up-regulated after 6h salt treatment in NIL-T or NIL-S,  
286 respectively; and 608 and 593 in the 3d salt treatment, respectively (Fig. 3g). We found  
287 similar values for uniquely down-regulated DEGs (Fig. 3h).

288

#### 289 *GO analysis of DEGs between control and salt-treated samples of NIL-T and NIL-S*

290 To gain insight into the putative functions of the uniquely up- and down-regulated  
291 DEGs at 6h salt treatment, the identified genes were subjected to GO (Gene Ontology)  
292 enrichment analysis, the representative GO terms are shown in Table 2, and detailed GO  
293 terms are shown in Supplementary Fig. 1 - 4.

294 The enriched GO terms for the 6h T (NIL-T) up-regulated DEGs were all related to  
295 stress response such as “oxidation reduction”, “defence response” and “response to biotic  
296 stimulus” (Table 2a). Down-regulated GO terms in NIL-T were less specific and mainly  
297 associated with “integral to membrane” (Table 2c). For 6h S (NIL-S), a large number of up-

298 regulated genes were associated with the very broad GO term “regulation of transcription,  
299 DNA-dependent (GO:0006355)”, and no further downstream classification was considerably  
300 enriched (Table 2b). Down-regulated GO terms in NIL-S included “heme binding”, “electron  
301 carrier activity”, “aspartic-type endopeptidase activity”, and “protein disulphide  
302 oxidoreductase activity” (Table 2d), relating to protein types instead of specific biological  
303 process GO terms.

304 After 3 days of salt treatment, GO analysis of uniquely up- and down-regulated DEGs  
305 showed that only “oxidation reduction” and “oxidoreductase activity” were up-regulated in  
306 NIL-T (Table 3a). “Oxidation reduction” and “oxidoreductase activity” were consistently up-  
307 regulated in NIL-T at both time points. Table 4 shows all the 53 up-regulated genes in  
308 “oxidation reduction” and “oxidoreductase activity” GO terms after 3d treatment in NIL-T  
309 roots. A group of Cytochrome P450 enzymes-encoding genes were significantly more highly  
310 expressed in NIL-T, especially *Glyma.13G173500*, which had a FPKM of 279 compared to  
311 71 under control conditions (Table 4). Other genes encoding oxidoreductase enzymes were  
312 also included such as peroxidases and dehydrogenases (Table 4). All the gene annotations in  
313 each GO are shown in Supplementary Table 1.

314

### 315 *KEGG analysis of DEGs between control and salt-treated samples*

316 To understand what pathways were differently altered in NIL-T and NIL-S under salt  
317 stress, KEGG (Kyoto Encyclopedia of Genes and Genomes) analysis was performed. This  
318 analysis can reveal enrichments of biological pathways, similar to GO term analysis but  
319 KEGG takes fold changes of DEGs into account, while the GO term analysis does not.

320 In our analysis, 1816 and 3054 DEGs in NIL-T and NIL-S, respectively, were  
321 enriched in 58 pathways (corrected  $p$ -Value  $<0.05$ ) after 6h salt-treatment (Fig. 4a). Most of  
322 the 58 pathways in both NIL-T and NIL-S were within the metabolism category with

323 “Phenylpropanoid biosynthesis”, “Phenylalanine metabolism”, and “Starch and sucrose  
324 metabolism” as the top three pathways (Fig. 4a). Overall, NIL-S has more DEGs compared to  
325 NIL-T after salt-treatment, across all significantly changed pathways.

326 After three days of salt stress (3d), 2844 and 2573 DEGs in NIL-T and NIL-S,  
327 respectively, were mapped to 57 pathways (corrected  $p$ -Value <0.05) (Fig. 4b). The  
328 metabolism category was also the most enriched after 3 days with similar pathways involved  
329 compared to 6 hours. After 3d salt-treatment, most of the significantly changed pathways  
330 included more DEGs in NIL-T compared to NIL-S, in particular in the pathway “Protein  
331 processing in endoplasmic reticulum” (16 to 11 DEGs), the cell organelle where GmSALT3  
332 is localised (Guan *et al.*, 2014). DEG enrichment in NIL-T was also higher in the pathways  
333 “Ubiquitin mediated proteolysis” (10 to 3 DEGs), “Phenylpropanoid biosynthesis” (71 to 60  
334 DEGs), “Phenylalanine metabolism” (52 to 42 DEGs), “Starch and sucrose metabolism” (43  
335 to 35 DEGs), and “Plant-pathogen interaction” (33 to 20 DEGs). It is important to note that  
336 all plants (NIL-T and NIL-S) were grown together and no plants showed signs of infection,  
337 suggesting that the genes categorised into this pathway also have a function in abiotic stress  
338 response.

339 In the “Plant-pathogen interaction” pathway, the putative CNGC (Cyclic Nucleotide-  
340 Gated ion Channel) 15-like gene, *Glyma.13G141000*, was significantly down-regulated in 3d  
341 T (Supplementary Fig. 5a; 5b), probable putative CNGC 20-like gene, *Glyma.09G168700*,  
342 was upregulated in 3d S. Several CaM (Calmodulin) and CML (Calmodulin-like) genes were  
343 down-regulated in 3d T. CDPK (Calcium-Dependent Protein Kinase 3, *Glyma.08G019700*)  
344 and Rboh (Respiratory Burst Oxidase Homolog protein F-like isoform 1, *Glyma.01G222700*)  
345 were up-regulated in 3d S. However, at 6h, another CNGC 20-like gene (*Glyma.16G218300*),  
346 homolog to the Arabidopsis putative Ca<sup>2+</sup> channel that is proposed to regulate cytosolic Ca<sup>2+</sup>

347 activity and expression of Rhob and CaM/CML (Demidchik *et al.*, 2018), was significantly  
348 up-regulated in NIL-T (Supplementary Fig. 5d).

349

350

351 *Weighted Gene Co-expression Network Analysis (WGCNA)*

352 WGCNA identifies genes that have strongly correlated expression profiles, and those  
353 genes work cooperatively in related pathways to contribute to corresponding phenotypes. It is  
354 based on the concept that genes with strongly correlated expression profiles are clustered  
355 because those genes work associatively in related pathways, contributing to the resulting  
356 phenotype; in our case, establishing salinity tolerance after salt treatment. We applied the  
357 WGCNA to the normalized FPKM data (FPKM > 2) from all 30 RNA-seq libraries.

358 A co-expression network was constructed, and highly co-expressed genes were  
359 assigned to different colour-coded modules (Supplementary Fig. 6). Clusters were  
360 summarized by correlating the module's eigengene (or an intramodular hub gene) to the  
361 sample traits (Langfelder and Horvath, 2008). Module - Trait Relationships (MTRs) were  
362 computed based on Pearson's correlation between module and phenotypes, and then be used  
363 to screen modules for downstream analysis. Thirty clusters of highly co-expressed genes  
364 (modules) were detected and are shown in differently coloured module (Fig. 5). To  
365 investigate what genes show strongly correlated co-expression in NIL-T under saline  
366 conditions (6h and 3d), two modules of interest were selected for functional annotation based  
367 on their correlation value and corresponding *p*-Value. One module contains 79 genes that  
368 show strongly correlated co-expression in NIL-T after 6h salt treatment; this model is  
369 depicted here in a shade of pink (MEdeppink). The second selected module, colour-coded  
370 here in a shade of white (MEantiquewhite2), contains 406 genes which expression profiles  
371 are highly correlated in NIL-T after 3d salt treatment.

372 GO analysis of 79 genes in module MEdeppink is shown in Table 5a; GO analysis of  
373 406 genes in module MEantiquewhite2 is shown in Table 5b. Within the highly co-expressed  
374 79 genes in NIL-T after 6h salt treatment (MEdeppink module), Gene Ontology (GO)  
375 analysis indicates 12 of them are integral to plasma membrane (GO:0016021; Table 5a), and  
376 they encode a group of Casparian strip membrane proteins (Supplementary Table 1). Highly  
377 co-expressed 406 genes in NIL-T after 3d salt treatment (MEantiquewhite2 module) are  
378 enriched in GO: 0016021 (integral to membrane; 26 genes), which are related to intracellular  
379 vesicle trafficking and ion transport (Table 5b). Within those GOs, there are genes relevant to  
380 vesicle transport, such as genes encoding for coatamer subunits and transmembrane protein  
381 transporters; three potassium transporters including Glyma05g37270 (TRH1; tiny root hair 1),  
382 Glyma08g39860 (KUP6; potassium ion uptake transporter 6), and Glyma13g23960  
383 (Supplementary Table 1).

384

#### 385 *RT-qPCR validation for RNA-seq results*

386 In order to confirm the RNA-seq results, 10 DEGs were selected for RT-qPCR  
387 validation based on their RPKM transcript abundance. Importantly, this occurred on  
388 independently grown plants not used for RNAseq analysis but grown in identical conditions.  
389 RT-qPCR indicated that relative expression values (relative to housekeeping gene *GmUKNI*)  
390 of the selected DEGs were significantly correlated with their FPKM values (supplementary  
391 Fig. 7).

392

#### 393 *ROS production and scavenger enzymes activity*

394 Due to the enrichment of the “Oxidation reduction” gene ontology category in NIL-T  
395 plants under salt (Table 4), we decided to test if this translated into a difference in ROS  
396 generation or detoxification in NIL-T compared to NIL-S, again on independently grown



397 plants. The ROS activity was measured in the roots of NIL-T and NIL-S after a 3-day  
398 treatment with or without salt treatment, using a fluorescent dye (Fig. 6a; 6b). We could  
399 detect a lower ROS activity in NIL-T compared to NIL-S roots, already in the control  
400 conditions, consistent with the expression of *GmSALT3* under control conditions. This  
401 difference strongly increased when comparing plants from saline conditions; ROS were  
402 strongly produced in NIL-S under salt treatment.

403 ROS are composed of many different molecules; we initially measured the  
404 concentration of the ROS H<sub>2</sub>O<sub>2</sub>. We could detect a higher H<sub>2</sub>O<sub>2</sub> concentration in both lines  
405 under salt treatment compared to control; but no concentration differences between NIL-T  
406 and NIL-S in either control or salt treatment could be measured (Supplementary Fig. 9),  
407 suggesting that the increase in ROS is attributed to a different molecule. The antioxidant  
408 properties of the roots of NIL-T and NIL-S with or without salt treatment was then analysed  
409 using guaiacol. The antioxidant enzyme activity was assayed by measuring the absorbance at  
410 470 nm due to the enzyme dependent oxidation of guaiacol by H<sub>2</sub>O<sub>2</sub> (Pi *et al.*, 2016). The  
411 scavenging enzyme activity of the superoxide anion was significantly higher in NIL-T  
412 compared to NIL-S under control and saline conditions (Fig. 6c).

413

## 414 Discussion

415 Soybean cultivars harbouring *GmSALT3* are better able to modulate Na<sup>+</sup>, K<sup>+</sup>, and Cl<sup>-</sup>  
416 content of shoots under salinity (Guan *et al.*, 2014; Qi *et al.*, 2014; Do *et al.*, 2016; Liu *et al.*,  
417 2016; Qu *et al.*, 2021), and they have a yield advantage under saline conditions compared to  
418 soybean varieties without a functional *GmSALT3* (Do *et al.*, 2016, Liu *et al.*, 2016). The  
419 *GmSALT3* ion transport protein is ER-localised (Guan *et al.*, 2014), suggesting a cellular  
420 function of *GmSALT3* that is not directly connected to ion uptake or exclusion. We  
421 performed detailed and extended RNAseq analysis of NIL-T and NIL-S soybeans to decipher

422 the cellular pathways and processes that connect *GmSALT3* to soybean salinity tolerance. We  
423 could identify several genes and biological pathways involved in responses to salt stress in  
424 *GmSALT3*-containing NIL-T plants, which gives an insight into how *GmSALT3* expression  
425 translates into a phenotype through modulating cell processes.

426 Illumina sequencing results showed that all the 30 constructed RNA-seq libraries  
427 were of sufficient quality for further analysis. On average the RNA-seq libraries had 26.8  
428 million clean mapped reads, and reads were mapped to 53,625 annotated soybean genes with  
429 353 additional transcripts not previously annotated – probably due to the germplasm being  
430 genetically divergent from the reference. Minimal DEGs could be detected between NIL-T  
431 and NIL-S at 0h, 6h, and 3d under control conditions (Fig. 2), this indicates that NIL-T and  
432 NIL-S roots had similar gene expression patterns under non-stressed conditions. In the three  
433 consistently up-regulated DEGs in NIL-S at all time points under control conditions, there  
434 was a gene encoding for a LOX (Linoleate 13S-lipoxygenase 3-1) (Fig. 2c). Lipoxygenases  
435 (LOXs) are involved in defence responses against biotic stresses, such as microbial pathogens  
436 and insect pests, in tomato (Hu *et al.*, 2015), potato (Royo *et al.*, 1999), maize (Gao *et al.*,  
437 2009), and rice (Zhou *et al.*, 2009). The full length *GmSALT3* during soybean natural  
438 selection and domestication was lost several times independently (Guan *et al.*, 2014),  
439 suggesting that plants with a non-functional *GmSALT3* might have a benefit when grown  
440 under non-saline conditions. This benefit might be related to higher LOXs expression in  
441 soybean cultivars harbouring the sensitive alleles, which could be beneficial under certain  
442 biotic stresses. In potato, depletion of one specific LOX (LOX-H3) negatively affected their  
443 response to stress (Royo *et al.*, 1999), but here in soybean, plants with the full length  
444 *GmSALT3* had lower LOX expression than with the non-functional *GmSALT3*. Therefore,  
445 this calls for further research to investigate the role of these LOX in soybean function and  
446 whether there is a link to *GmSALT3* in response to abiotic stresses in soybean.

447 Comparing DEGs, the GO terms “Oxidation reduction (GO:0055114)” and  
448 “oxidoreductase activity (GO:0016491)” were consistently up-regulated in NIL-T at 6h and  
449 3d of salt treatment, with a greater number of genes in this term up-regulated after 3 days,  
450 which indicates that NIL-T plants may have a greater capacity to detoxify ROS (Reactive  
451 oxygen species) than NIL-S plants. We could experimentally confirm this and show that  
452 more ROS is produced NIL-S compared to NIL-T (Fig. 6a; 6b) and NIL-T possessed a  
453 significantly higher scavenging enzyme activity of the superoxide anion ( $O_2^-$ ) (Fig. 6c).  
454 Phenylalanine is the precursor for flavonoids, and flavonoids are utilised to scavenge and  
455 protect against ROS (Dastmalchi *et al.*, 2016). The increase in gene expression related to  
456 phenylalanine synthesis seen in NIL-T (Fig 4a; 4b) is consistent with the observation that  
457 GmSALT3 is connected to an increase in general ROS detoxification capacity.

458 In all the listed up-regulated genes in NIL-T (Table 4), a group of Cytochrome P450  
459 enzymes-coding genes were significantly more highly expressed in NIL-T in response to salt-  
460 treatment, especially *Glyma.13G173500*, which has the highest expression level and a fold  
461 change of 3.93. The cytochrome P450 (CYP) family is a large and essential protein  
462 superfamily in plants, and CYPs catalyse monooxygenation/hydroxylation reactions in  
463 primary and secondary metabolism pathways (Mizutani and Ohta, 2010). NaCl can induce  
464 conformational change of cytochrome P450 in animals (Yun *et al.*, 1996; Oyekan *et al.*,  
465 1999), but this has not been investigated in plants. In soybean, there are 322 identified CYPs,  
466 with only few of them having been functionally characterised (Guttikonda *et al.*, 2010).  
467 *GmCYP82A3* (*Glyma.13g068800*) (Yan *et al.*, 2016) and *GmCYP51G1* (*Glyma.07g110900*)  
468 (Pi *et al.*, 2016) were shown to be involved in plant tolerance stresses such as salinity and  
469 drought. The two P450 containing isoflavone synthases (IFS) *GmIFS1* (*Glyma.07G202300*)  
470 and *GmIFS2* (*GmCYP93C1* = *Glyma.13G173500*) are both anchored in the ER, the same  
471 organelle where GmSALT3 is localised. *GmIFS2* is a DEG identified in our study.

472 Expression of *GmIFS1* was previously shown to be induced by salt stress, and has been  
473 linked to improving salinity tolerance through the accumulation of isoflavone content (Jia *et*  
474 *al.*, 2017). We found its homologue, *GmIFS2* (*Glyma.13G173500*), had a fold change of 3.93  
475 in NIL-T in response to salt stress (Table 4). Combined, this suggests that the function of  
476 GmSALT3 could be important for the synthesis of isoflavones, and this may contribute to salt  
477 tolerance.

478 ROS production has been linked to Ca<sup>2+</sup> influx into cells and specifically the activity  
479 of CNGCs (Ma *et al.*, 2009). Ca<sup>2+</sup> and ROS act as signalling molecules when plant roots are  
480 suddenly exposed to salt (Byrt *et al.*, 2018). Gene expression related to proposed Ca<sup>2+</sup>  
481 signalling elements are different between NIL-T and NIL-S. As a result, our analysis  
482 suggested that the “Plant-pathogen interaction” pathway could be highly activated in NIL-S,  
483 which may lead to higher ROS production and hypersensitive responses (Supplementary Fig.  
484 5a; 5c). Under 6h salt treatment, several CNGCs were also significantly up-regulated in NIL-  
485 S, which may relate to activation of different signalling cascades (Supplementary Fig. 5d).  
486 Several CaM (Calmodulin) and CML (Calmodulin-like) genes are also down-regulated in 3d  
487 T (Supplementary Fig. 5b), down-regulation of CaM and CML may have been proposed to  
488 restrict gaseous reactive oxygen species (ROS) production in plants (Ma and Berkowitz,  
489 2011).

490 The WGCNA analysis revealed that genes related to Casparian strip (CS)  
491 development were upregulated in NIL-T within 6 hours of salt treatment. CSs play an  
492 important role in regulating nutrient uptake and salt stress tolerance, as they form the  
493 diffusion barrier for ions into the stele (Chen *et al.*, 2011; Roppolo *et al.*, 2011). CS localised  
494 membrane proteins (CASPs) were shown to mediate CS formation in Arabidopsis, by guiding  
495 the local lignin deposition during cell wall modification (Roppolo *et al.*, 2011). Upon  
496 immobilisation, CASPs recruit PER64 (Peroxidase 64), RBOHF (Respiratory Burst Oxidase

497 Homolog F), ESB1 (Enhanced Suberin 1), and dirigent proteins, to establish the lignin  
498 polymerization system (Hosmani et al., 2013; Kamiya et al., 2015; Lee et al., 2013). Our  
499 analysis identified a module of genes upregulated under salt exclusively in the NIL-T  
500 (MKdeepink module). This module contains 8 dirigent genes, peroxidase 64  
501 (Glyma.14g221400) as well as CASPs. The combination of genes in this model suggests that  
502 NIL-T plants might more efficiently induce an earlier formation of the endodermal diffusion  
503 barrier as well as the formation of an exodermal diffusion barrier, in response to salt stress.  
504 We stained lignin and suberin in NIL-T and NIL-S roots with ClearSee and Auramine O,  
505 following the protocol developed by Ursache *et al.* (2018), in order to compare the CS  
506 development. Unfortunately, we could only observe autofluorescence in both NIL-T and  
507 NIL-S root differentiation zone that close to the root tips using confocal microscopy. So the  
508 link between GmSALT3 and CS formation needs further validation.

509 Lastly, CHX transporters (of which GmSALT3 is a member) were shown to be  
510 associated with the endocytic and exocytic pathways in dynamic endomembrane system  
511 (Chanroj *et al.*, 2012; Padmanaban *et al.*, 2007). Our results and the previously proposed  
512 vesicle trafficking function of CHXs (Chanroj *et al.*, 2012), suggests that GmSALT3 might  
513 be important for establishing optimal conditions in the ER lumen, which could subsequently  
514 impact the secretion of compounds such as signalling molecules, ions, and soluble proteins.

515 To summarize, our findings suggest that the GmSALT3 containing NIL-T has a  
516 higher salinity tolerance because NIL-T roots are more effective in scavenging ROS, which  
517 helps to prevent cellular damage. Our results suggest that the improved ROS detoxification  
518 mechanisms might be connected to ER-localised flavonoid biosynthesis enzymes.  
519 Additionally, our study has identified that Ca<sup>2+</sup> signalling, vesicle trafficking and Casparian  
520 strip development might be modulated by GmSALT3, and are therefore areas for further  
521 study.

522

523 [Supplementary data](#)

524 **Supplementary Fig. 1 GO term analysis of unique DEGs under salt treatment in NIL-T**  
525 **roots after 6h 200 mM NaCl treatment.**

526 **Supplementary Fig. 2 GO term analysis of unique DEGs under salt treatment in NIL-S**  
527 **roots after 6h 200 mM NaCl treatment.**

528 **Supplementary Fig. 3 GO term analysis of unique DEGs under salt treatment in NIL-T**  
529 **roots after 3d 200 mM NaCl treatment.**

530 **Supplementary Fig. 4 GO term analysis of unique DEGs under salt treatment in NIL-S**  
531 **roots after 3d 200 mM NaCl treatment.**

532 **Supplementary Fig. 5. DEGs between salt-treated and control samples of NIL-T and**  
533 **NIL-S in plant-pathogen interaction KEGG pathway at 6h and 3d.**

534 **Supplementary Fig. 6 Gene dendrogram showing the co-expression modules defined by**  
535 **the WGCNA labelled by colours.**

536 **Supplementary Fig. 7 qPCR validation for RNA-seq results of selected genes.**

537 **Supplementary Fig. 8 *Glyma.13G173500 (GmIFS2)* gene expression (FPKM) in all**  
538 **samples.**

539 **Supplementary Fig. 9 H<sub>2</sub>O<sub>2</sub> concentration measurement in soybean roots.**

540 **Supplementary Table 1 gene annotations in each GO (attached as an Excel file).**

541 [Acknowledgements](#)

542 This work was funded by the Natural Science Foundation of China, grant number 31830066  
543 (RG); Scientific Innovation Project of Chinese Academy of Agricultural Sciences (L-J Q).  
544 YQ and SH were supported by ARC Centre of Excellence funding awarded to MG  
545 (CE140100008). ARC Fellowships supported MG (FT130100709) and SW (DE160100804).  
546 We thank Na Sai and Dr. Miriam Schreiber for assisting in WGCNA analysis.

547

548 [Author contributions](#)

549 MG, YQ and RG designed experiments, with input from SW and LQ. YQ and RG analysed  
550 the data. LQ and MG directed the project. OB and JW contributed to RNA-sequencing. LY  
551 performed plant samples harvest for RNA-sequencing. RD contributed to RNA-sequencing  
552 analysis. YQ, MG and RG wrote the paper. SW and LQ assisted in editing the final version  
553 of the manuscript. All authors commented on the manuscript.

554

555 [Conflict of interest](#)

556 The authors declare that they have no conflict of interest.

557

558 [Data availability statement](#)

559 The data supporting the findings of this study are available from the corresponding author,  
560 Matthew Gilliam, upon request.

561

562

563

564

565 **References**

- 566 **Aghaei K, Ehsanpour A, Shah A, Komatsu, S.** 2009. Proteome analysis of soybean  
567 hypocotyl and root under salt stress. *Amino Acids* **36**, 91-98.
- 568 **Andrews S.** 2010. FastQC: a quality control tool for high throughput sequence data.  
569 <http://www.bioinformatics.babraham.ac.uk/projects/fastqc/>.
- 570 **Bose J, Rodrigo-Moreno A, Shabala, S.** 2014. ROS homeostasis in halophytes in the  
571 context of salinity stress tolerance. *Journal of Experimental Botany* **65**, 1241-1257.
- 572 **Byrt CS, Munns R, Burton RA, Gilliham M, Wege S.** 2018. Root cell wall solutions for  
573 crop plants in saline soils. *Plant Science* **269**, 47-55.
- 574 **Chanroj S, Wang G, Venema K, Zhang MW, Delwiche CF, Sze H.** 2012. Conserved and  
575 diversified gene families of monovalent cation/H<sup>+</sup> antiporters from algae to flowering  
576 plants. *Frontiers in Plant Science* **3**, 25.
- 577 **Chen T, Cai X, Wu X, Karahara I, Schreiber L, Lin J.** 2011. Casparian strip development  
578 and its potential function in salt tolerance. *Plant signaling & behavior* **610**, 1499-1502.
- 579 **Dastmalchi M, Bernardis MA, Dhaubhadel S.** 2016. Twin anchors of the soybean  
580 isoflavonoid metabolon: evidence for tethering of the complex to the endoplasmic reticulum  
581 by IFS and C4H. *The Plant Journal* **85**, 689-706.
- 582 **Demidchik V, Shabala S, Isayenkov S, Cuin TA, Pottosin I.** 2018. Calcium transport  
583 across plant membranes: mechanisms and functions. *New Phytologist* **220**: 49-69.
- 584 **Do TD, Chen H, Hien VTT, et al.** 2016. Ncl synchronously regulates Na<sup>+</sup>, K<sup>+</sup>, and Cl<sup>-</sup> in  
585 soybean and greatly increases the grain yield in saline field conditions. *Scientific Reports* **6**,  
586 19147.
- 587 **Dong W, Wang M, Xu F, Quan T, Peng K, Xiao L, Xia G.** 2013. Wheat oxophytodienoate  
588 reductase gene TaOPR1 confers salinity tolerance via enhancement of abscisic acid signaling  
589 and reactive oxygen species scavenging. *Plant Physiology* **161**, 1217-1228.
- 590 **Du Z, Zhou X, Ling Y, Zhang Z, Su Z.** 2010. agriGO: a GO analysis toolkit for the  
591 agricultural community. *Nucleic Acids Research* **38**, 64-70.
- 592 **Choudhury FK, Rivero RM, Blumwald E, Mittler R.** 2017. Reactive oxygen species,  
593 abiotic stress and stress combination. *The Plant Journal* **90**, 856-867.
- 594 **Flowers TJ, Galal HK, Bromham L.** 2010. Evolution of halophytes: multiple origins of salt  
595 tolerance in land plants. *Functional Plant Biology* **37**, 604-612.
- 596 **Foreman J, Demidchik V, Bothwell JH, et al.** 2003. Reactive oxygen species produced by  
597 NADPH oxidase regulate plant cell growth. *Nature* **422**, 442-446.
- 598 **Foyer CH, Noctor G.** 2005. Redox homeostasis and antioxidant signaling: a metabolic  
599 interface between stress perception and physiological responses. *Plant Cell* **17**, 1866-1875.
- 600 **Gao X, Brodhagen M, Isakeit T, Brown SH, Göbel C, Betran J, Feussner I, Keller NP,**  
601 **Kolomiets MV.** 2009. Inactivation of the lipoxygenase ZmLOX3 increases susceptibility of  
602 maize to *Aspergillus spp.* *Molecular Plant Microbe Interact* **22**, 222-231
- 603 **Ge Y, Li Y, Zhu YM, Bai X, Lv DK, Guo D, Ji W, Cai H.** 2010. Global transcriptome  
604 profiling of wild soybean *Glycine soja* roots under NaHCO<sub>3</sub> treatment. *BMC Plant Biology*  
605 **10**, 153.
- 606 **Gill SS, Tuteja N.** 2010. Reactive oxygen species and antioxidant machinery in abiotic stress  
607 tolerance in crop plants. *Plant Physiology and Biochemistry* **48**, 909-930.
- 608 **Gilliham M, Able JA, Roy SJ.** 2017. Translating knowledge about abiotic stress tolerance to  
609 breeding programmes. *The Plant Journal* **90**, 898-917.
- 610 **Grant D, Nelson RT, Cannon SB, Shoemaker RC.** 2010. SoyBase, the USDA-ARS  
611 soybean genetics and genomics database. *Nucleic Acids Research* **38**, D843-6.
- 612 **Gribskov M, McLachlan AD, Eisenberg D.** 1987. Profile analysis: detection of distantly  
613 related proteins. *Proceedings of the National Academy of Sciences USA* **84**, 4355-4358.



- 614 **Guan R, Qu Y, Guo Y, et al.** 2014. Salinity tolerance in soybean is modulated by natural  
615 variation in GmSALT3. *The Plant Journal* **80**, 937-950.
- 616 **Guttikonda SK, Trupti J, Bisht NC, Chen H, An YQC, Pandey S, Xu D, Yu O.** 2010.  
617 Whole genome co-expression analysis of soybean cytochrome P450 genes identifies  
618 nodulation-specific P450 monooxygenases. *BMC Plant Biology* **10**, 243.
- 619 **Hosmani PS, Kamiya T, Danku J, Naseer S, Geldner N, Guerinot ML, Salt DE.** 2013.  
620 Dirigent domain-containing protein is part of the machinery required for formation of the  
621 lignin-based Casparian strip in the root. *Proceedings of the National Academy of Sciences*  
622 *USA* **11035**, 14498-14503.
- 623 **Hu R, Fan C, Li H, Zhang Q, Fu YF.** 2009. Evaluation of putative reference genes for gene  
624 expression normalization in soybean by quantitative real-time RT-PCR. *BMC molecular*  
625 *biology* **10**, 93.
- 626 **Hu T, Hu Z, Zeng H, Qv X, Chen G.** 2015. Tomato lipoxygenase D involved in the  
627 biosynthesis of jasmonic acid and tolerance to abiotic and biotic stress in tomato. *Plant*  
628 *Biotechnology Reports* **9**, 37-45.
- 629 **Jia T, An J, Liu Z, Yu B, Chen J.** 2017. Salt stress induced soybean GmIFS1 expression  
630 and isoflavone accumulation and salt tolerance in transgenic soybean cotyledon hairy roots  
631 and tobacco. *Plant Cell, Tissue and Organ Culture* **128**, 469-477.
- 632 **Kamiya T, Borghi M, Wang P, et al.** 2015. The MYB36 transcription factor orchestrates  
633 Casparian strip formation. *Proceedings of the National Academy of Sciences USA* **11233**,  
634 10533-10538.
- 635 **Kanehisa M, Araki M, Goto S, et al.** 2007. KEGG for linking genomes to life and the  
636 environment. *Nucleic Acids Research* **36**, D480-4.
- 637 **Kim D, Pertea G, Trapnell C, Pimentel H, Kelley R, Salzberg SL.** 2013. TopHat2:  
638 accurate alignment of transcriptomes in the presence of insertions, deletions and gene fusions.  
639 *Genome Biology* **14**, R36.
- 640 **Lam HM, Xu X, Liu X, et al.** 2010. Resequencing of 31 wild and cultivated soybean  
641 genomes identifies patterns of genetic diversity and selection. *Nature Genetics* **42**, 1053-1059.
- 642 **Langfelder P, Horvath S.** 2008. WGCNA: an R package for weighted correlation network  
643 analysis. *BMC Bioinformatics* **91**, 559.
- 644 **Langfelder P, Zhang B, Horvath S.** 2008. Defining clusters from a hierarchical cluster tree:  
645 the Dynamic Tree Cut package for R. *Bioinformatics* **245**, 719-720.
- 646 **Lee Y, Rubio MC, Alassimone J, Geldner N.** 2013. A mechanism for localized lignin  
647 deposition in the endodermis. *Cell* **1532**, 402-412.
- 648 **Liu Y, Yu L, Qu Y, et al.** 2016. GmSALT3, which confers improved soybean salt tolerance  
649 in the field, increases leaf Cl<sup>-</sup> exclusion prior to Na<sup>+</sup> exclusion but does not improve early  
650 vigor under salinity. *Frontiers in plant science* **7**, 1485
- 651 **Lu Y, Lam H, Pi E, Zhan Q, Tsai S, Wang C, Kwan Y, Ngai S.** 2013. Comparative  
652 metabolomics in Glycine max and Glycine soja under salt stress to reveal the phenotypes of  
653 their offspring. *Journal of Agricultural and Food Chemistry* **61**, 8711-8721.
- 654 **Ma W, Berkowitz GA.** 2011. Ca<sup>2+</sup> conduction by plant cyclic nucleotide gated channels and  
655 associated signaling components in pathogen defense signal transduction cascades. *New*  
656 *Phytologist* **190**, 566-572.
- 657 **Ma W, Smigel A, Verma R, Berkowitz GA.** 2009. Cyclic nucleotide gated channels and  
658 related signaling components in plant innate immunity. *Plant Signaling & Behavior* **4**, 277-  
659 282.
- 660 **Mao X, Cai T, Olyarchuk JG, Wei L.** 2005. Automated genome annotation and pathway  
661 identification using the KEGG Orthology KO as a controlled vocabulary. *Bioinformatics* **21**,  
662 3787-3793.

- 663 **Mittler R.** 2002. Oxidative stress, antioxidants and stress tolerance. *Trends in Plant Science* **7**,  
664 405-410.
- 665 **Mittler R, Vanderauwera S, Gollery M, Van Breusegem F.** 2004. Reactive oxygen gene  
666 network of plants. *Trends in Plant Science* **9**, 490-498.
- 667 **Mizutani M, Ohta D.** 2010. Diversification of P450 genes during land plant evolution.  
668 *Annual Review of Plant Biology* **61**, 291-315.
- 669 **Munns R, Gilliham M.** 2015. Salinity tolerance of crops—what is the cost? *New Phytologist*  
670 **208**, 668-673.
- 671 **Munns R, Tester M.** 2008 Mechanisms of salinity tolerance. *Annual Review of Plant*  
672 *Biology* **59**, 651-681.
- 673 **Neill S, Desikan R, Hancock J.** 2002 Hydrogen peroxide signalling. *Current Opinion in*  
674 *Plant Biology* **5**, 388-395.
- 675 **Noctor G, Foyer CH.** 1998. Ascorbate and glutathione: keeping active oxygen under control.  
676 *Annual Review of Plant Biology* **49**, 249-279.
- 677 **Overmyer K, Brosché M, Kangasjärvi J.** 2003. Reactive oxygen species and hormonal  
678 control of cell death. *Trends in Plant Science* **8**, 335-342.
- 679 **Oyekan A, Youseff T, Fulton D, Quilley J, McGiff J.** 1999. Renal cytochrome P450  $\omega$ -  
680 hydroxylase and epoxygenase activity are differentially modified by nitric oxide and sodium  
681 chloride. *Journal of Clinical Investigation* **104**, 1131-7.
- 682 **Padmanaban S, Chanroj S, Kwak JM, Li X, Ward JM, Sze H.** 2007. Participation of  
683 endomembrane cation/H<sup>+</sup> exchanger AtCHX20 in osmoregulation of guard cells. *Plant*  
684 *Physiology* **144**, 82-93.
- 685 **Pei ZM, Murata Y, Benning G, Thomine S, Klüsener B, Allen GJ, Grill E, Schroeder JJ.**  
686 2000. Calcium channels activated by hydrogen peroxide mediate abscisic acid signalling in  
687 guard cells. *Nature* **406**, 731-734.
- 688 **Pi, E, Qu, L, Hu, J, Huang, Y, Qiu, L, Lu, H, Jiang, B, Liu, C, Peng, T, Zhao, Y.** 2016  
689 Mechanisms of soybean roots' tolerances to salinity revealed by proteomic and  
690 phosphoproteomic comparisons between two cultivars. *Molecular & Cellular Proteomics* **15**,  
691 266-288.
- 692 **Prakash D, Niranjana A, Tewari SK, Pushpangadan P.** 2001. Underutilised legumes:  
693 potential sources for low-cost protein. *International Journal of Food Sciences and Nutrition*  
694 **52**, 337-341.
- 695 **Qi X, Li MW, Xie M, et al.** 2014. Identification of a novel salt tolerance gene in wild  
696 soybean by whole-genome sequencing. *Nature Communication* **5**, 4340.
- 697 **Qin, J, Gu, F, Liu, et al.** 2013 Proteomic analysis of elite soybean Jidou17 and its parents  
698 using iTRAQ-based quantitative approaches. *Proteome Science* **11**, 12.
- 699 **Qu Y, Guan R, Bose J, Henderson SW, Wege S, Qiu L, Gilliham M.** 2021. Soybean  
700 CHX-type ion transport protein GmSALT3 confers leaf Na<sup>+</sup> exclusion via a root derived  
701 mechanism, and Cl<sup>-</sup> exclusion via a shoot derived process. *Plant, Cell & Environment* **44**,  
702 856-869.
- 703 **Roppolo D, De Rybel B, Tendon VD, et al.** 2011. A novel protein family mediates  
704 Casparian strip formation in the endodermis. *Nature* **473**, 380-383.
- 705 **Roy SJ, Negrão S, Tester M.** 2014. Salt resistant crop plants. *Current Opinion in*  
706 *Biotechnology* **26**, 115-124.
- 707 **Royo J, León J, Vancanneyt G, Albar JP, Rosahl S, Ortego F, Castañera P, Sánchez-**  
708 **Serrano JJ.** 1999. Antisense-mediated depletion of a potato lipoxygenase reduces wound  
709 induction of proteinase inhibitors and increases weight gain of insect pests. *Proceedings of*  
710 *the National Academy of Sciences USA* **96**, 1146-1151.
- 711 **Saxena A, Singh P, Yadav DK, et al.** 2013 Identification of cytochrome P450 heme motif in  
712 plants proteome. *Plant Omics* **6**, 1.

- 713 **Sharma M, Gupta SK, Deeba F, Pandey V.** 2017. Effects of reactive oxygen species on  
714 crop productivity: an overview. In: Singh VP, Singh S, Tripathi DK, Prasad SM, Chauhan  
715 DK, eds. Revisiting the role of ROS in plants: boon Or bane - revisiting the role of ROS.  
716 Chapter 6.
- 717 **Stephan AB, Schroeder JI.** 2014. Plant salt stress status is transmitted systemically via  
718 propagating calcium waves. *Proceedings of the National Academy of Sciences USA* **111**,  
719 6126-6127.
- 720 **Toorchi M, Yukawa K, Nouri MZ, Komatsu S.** 2009. Proteomics approach for identifying  
721 osmotic-stress-related proteins in soybean roots. *Peptides* **30**, 2108-2117.
- 722 **Trapnell C, Roberts A, Goff L, et al.** 2012. Differential gene and transcript expression  
723 analysis of RNA-seq experiments with TopHat and Cufflinks. *Nature Protocols* **7**, 562-578.
- 724 **Ursache R, Andersen TG, Marhavý P, Geldner N.** 2018. A protocol for combining  
725 fluorescent proteins with histological stains for diverse cell wall components. *Plant Journal*  
726 **93**, 399-412.
- 727 **Yan Q, Cui X, Lin S, Gan S, Xing H, Dou D.** 2016. GmCYP82A3, a soybean cytochrome  
728 P450 family gene involved in the jasmonic acid and ethylene signaling pathway, enhances  
729 plant resistance to biotic and abiotic stresses. *PloS One* **11**, e0162253.
- 730 **Yun CH, Song M, Ahn T, Kim H.** 1996. Conformational change of cytochrome P450 1A2  
731 induced by sodium chloride. *Journal of Biological Chemistry* **271**, 31312-31316.
- 732 **Zhou G, Qi J, Ren N, Cheng J, Erb M, Mao B, Lou Y.** 2009. Silencing OsHI-LOX makes  
733 rice more susceptible to chewing herbivores, but enhances resistance to a phloem feeder.  
734 *Plant Journal* **60**, 638-648  
735  
736

## 737 [Figure legends](#)

738 **Fig. 1. Treatment, sampling strategy and data analysis.**

739 **Fig. 2. Overview of DEGs between NIL-T salt-tolerant and NIL-S salt-sensitive soybean**  
740 **samples at the 0h, 6h, and 3d timepoints under non-saline conditions.**

741 **Fig. 3. Overview of DEGs (differentially expressed genes) between salt-stressed and**  
742 **control samples in NIL-T and NIL-S soybeans at 6h and 3d.**

743 **Fig. 4. Significantly enriched KEGG (Kyoto Encyclopedia of Genes and Genomes) of all**  
744 **DEGs between salt-stressed and control samples in NIL-T and NIL-S soybeans.**

745 **Fig. 5 Module - Trait Relationships (MTRs) and corresponding *p*-values (within**  
746 **brackets) between the detected modules on the y-axis and groups (trait) on the x-axis.**

747 **Fig. 6 Relative ROS concentrations and enzyme activity of the superoxide anion (O<sub>2</sub><sup>-</sup>)**  
748 **scavenger assay in soybean roots.**

749 **Table 1. Reads mapping and quality of sequencing for 30 *Glycine max* root samples.**

750 **Table 2. GO term analysis of uniquely up- and down-regulated genes under salt**  
751 **treatment in soybean roots at 6h.**

752 **Table 3. GO term analysis of uniquely up- and down-regulated genes under salt**  
753 **treatment in soybean roots at 3d.**

754 **Table 4. Up-regulated genes in oxidation reduction and oxidoreductase activity GO**  
755 **terms of 3 days salt-treated NIL-T roots. Annotations are achieved from**  
756 **<https://www.soybase.org/genomeannotation/>.**

757 **Table 5 Significant Gene Ontology (GO) terms in MEdeppink and MEantiquewhite2**  
758 **modules.**

1 Figures

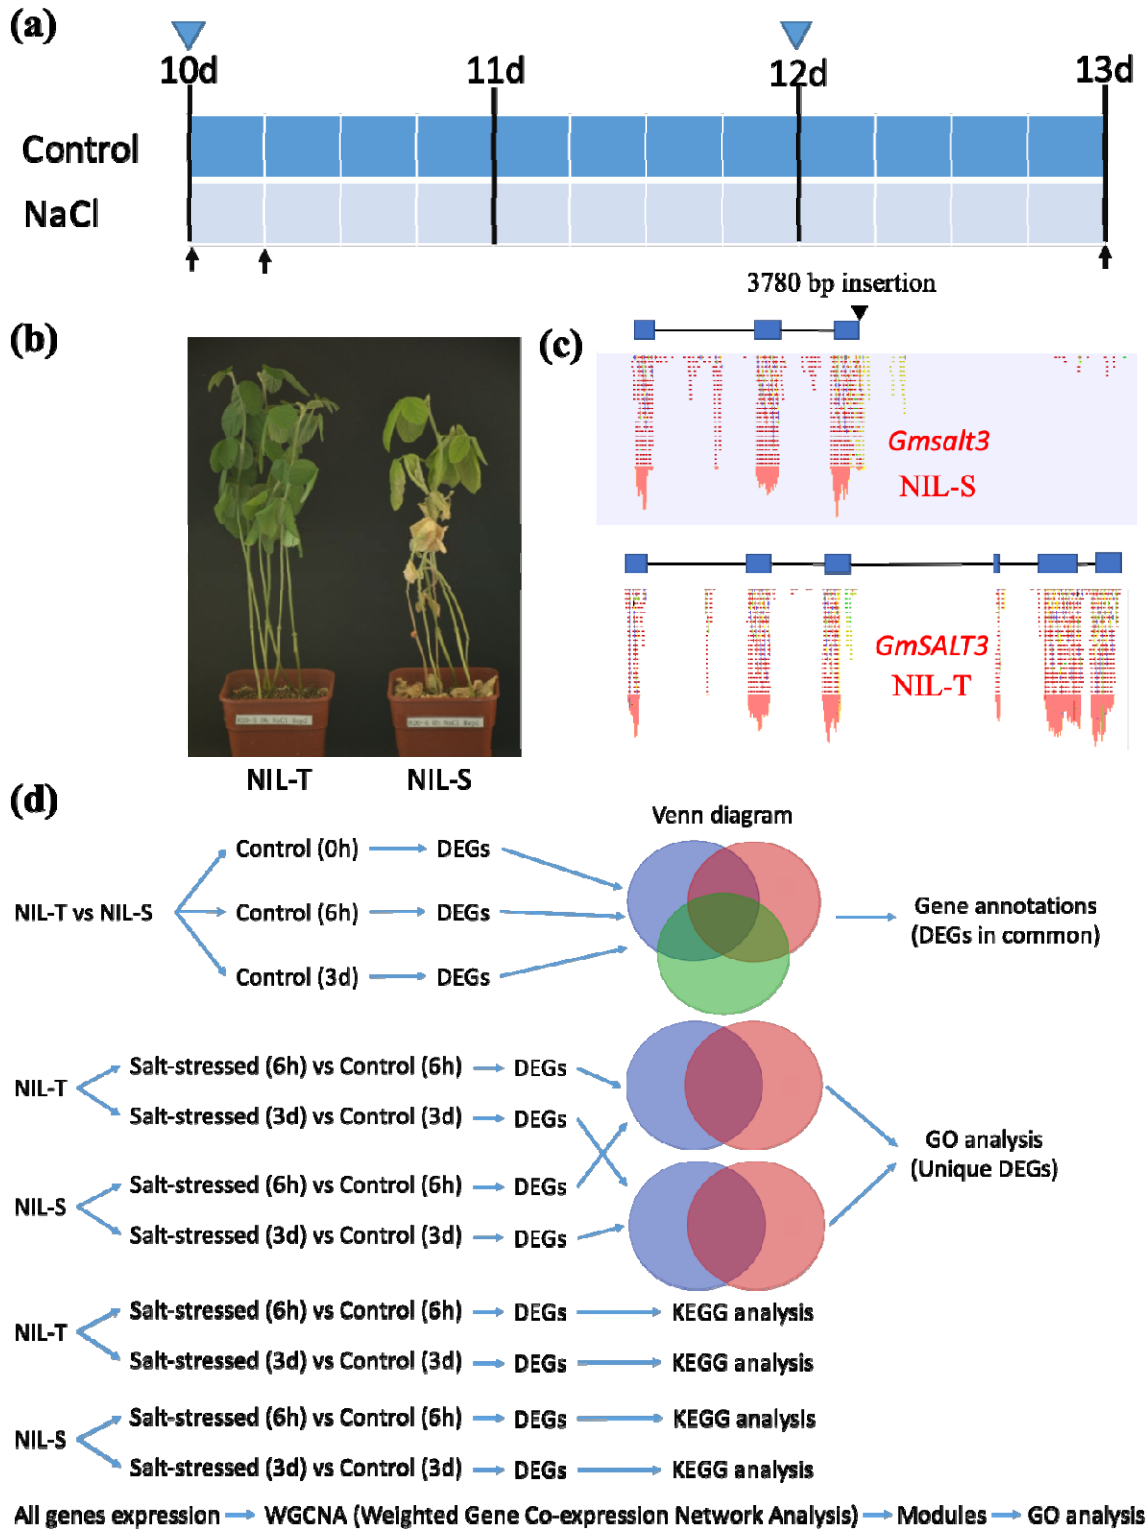

3 **Fig. 1. Treatment, sampling strategy and data analysis.** (a) Soybean seedlings were  
 4 treated with 200 mM NaCl (salt treatment) or water (control) at 10 days after sowing (DAS).

5 Arrows mean the sampling time points (0h, 6h, 3d), triangle indicated the time point when  
6 water or NaCl solution was applied. (b) Pictures of soybean that had been treated with NaCl  
7 solution for 11 days. (c) Mapped-reads to *GmSALT3* (bottom) and *Gmsalt3* (above). (d)  
8 Flowchart of data analysis. NIL-T, NIL with *GmSALT3* allele; NIL-S, NIL with *Gmsalt3*  
9 allele; DEGs, differentially expressed genes; GO, gene ontology.

10

11

12

13

14

15

16

17

18

19

20

21

22

23

24

25

26

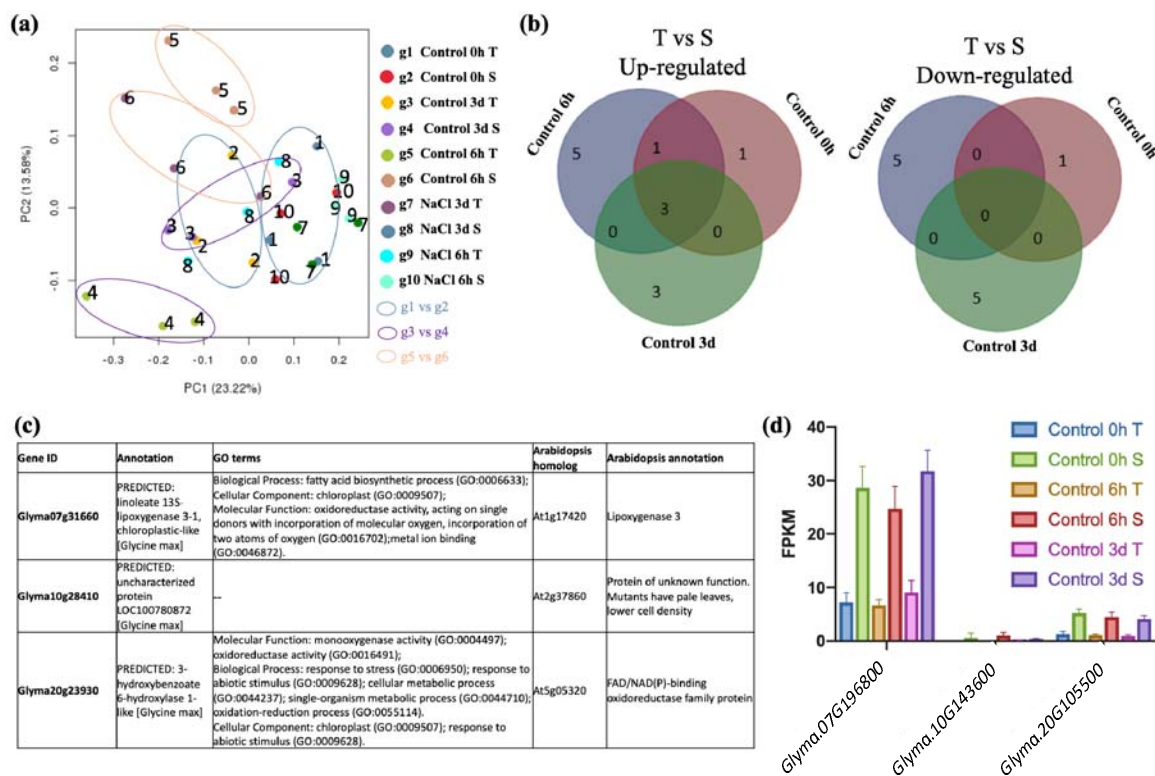

27

28 **Fig. 2. Overview of DEGs between NIL-T salt-tolerant and NIL-S salt-sensitive soybean**

29 **samples at the 0h, 6h, and 3d timepoints under non-saline conditions.** (a) PCA plot of ten

30 **groups (g1 – g10). Different coloured dots represent replicates in each group, different**

31 **coloured circles represent comparisons between groups (g1 vs g2, g3 vs g4, g5 vs g6).** (b)

32 **Venn diagram of up- and down-regulated DEGs in NIL-S soybeans at 0h, 6h, and 3d under**

33 **control conditions.** (c) **Three up-regulated DEGs in NIL-S soybeans at all 0h, 6h, and 3d**

34 **under control conditions, and their expression profile is shown in (d). The cutoffs for DEGs**

35 **are  $\text{Log}_2\text{FC}$  (fold change)  $\geq 1$ , FDR (False Discover Rate)  $< 0.01$ .**

36

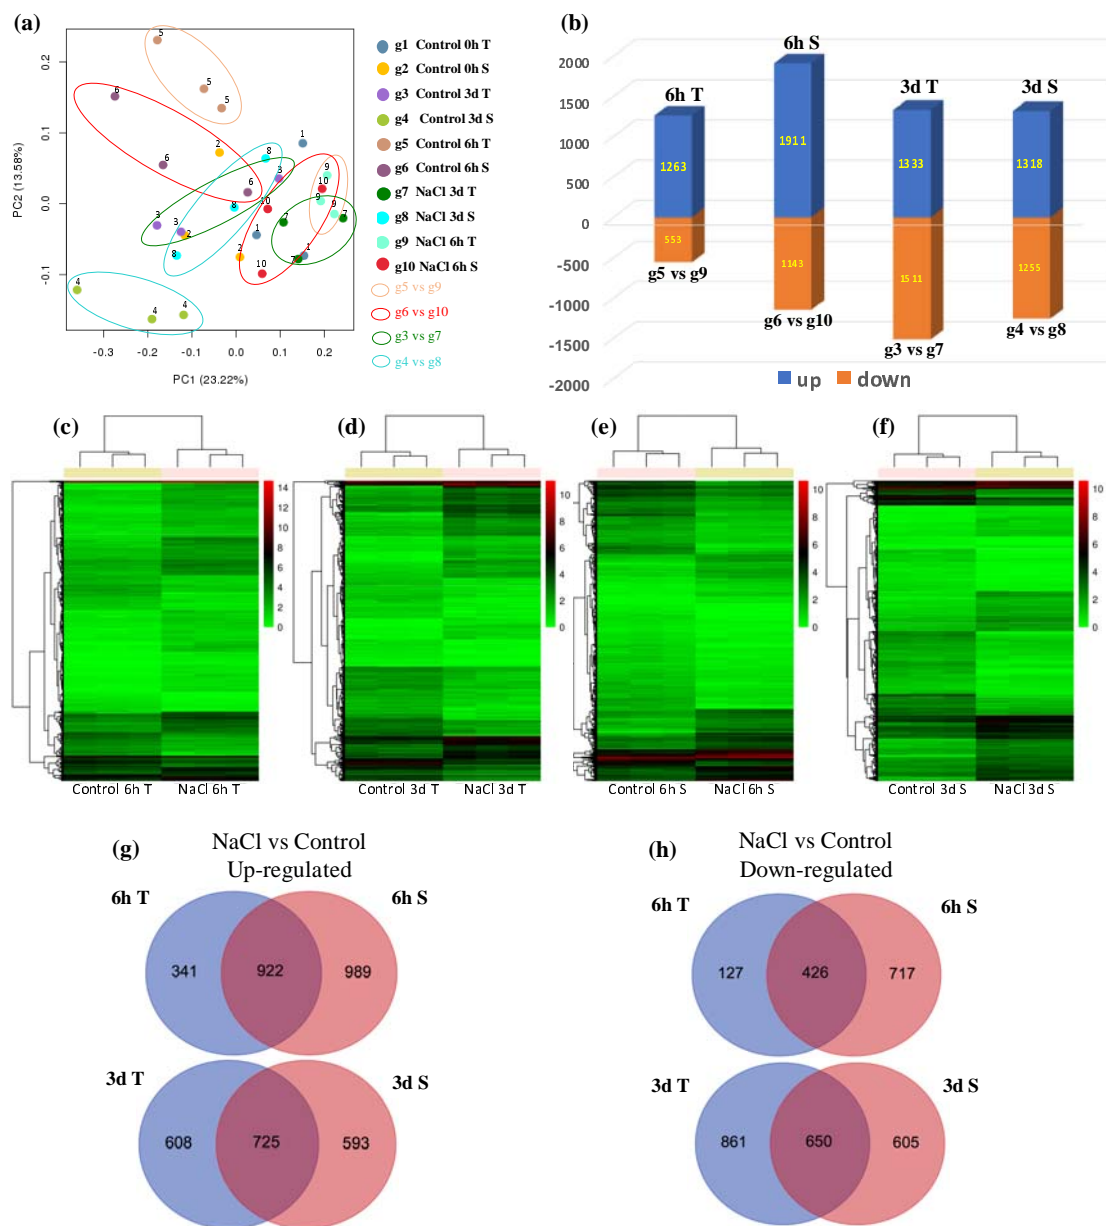

37

38 **Fig. 3. Overview of DEGs (differentially expressed genes) between salt-stressed and**  
 39 **control samples in NIL-T and NIL-S soybeans at 6h and 3d.** (a) PCA plot of ten groups  
 40 (g1 – g10). Different coloured dots represent replicates in each group, different coloured  
 41 circles represent comparisons between groups (g5 vs g9, g6 vs g10, g3 vs g7, g4 vs g8). (b)  
 42 Numbers of DEGs (up- and down-regulated) between groups. Clustering of DEGs in  
 43 log<sub>2</sub>FPKM (Fragments Per Kilobase of transcript per Million) of group 3 to 10 (c-f). The  
 44 false colour scale from green through to red indicates increasing log<sub>2</sub>FPKM. (g) Venn  
 45 diagram of up-regulated DEGs in NIL-T and NIL-S soybeans at 6h and 3d under NaCl  
 46 treatment. (h) Venn diagram of down-regulated DEGs in NIL-T and NIL-S soybeans at 6h



47 and 3d under NaCl treatment. The cut-offs for DEGs are  $\text{Log}_2\text{FC}$  (fold change)  $\geq 1$ , FDR  
 48 (False Discover Rate)  $< 0.01$ .  
 49

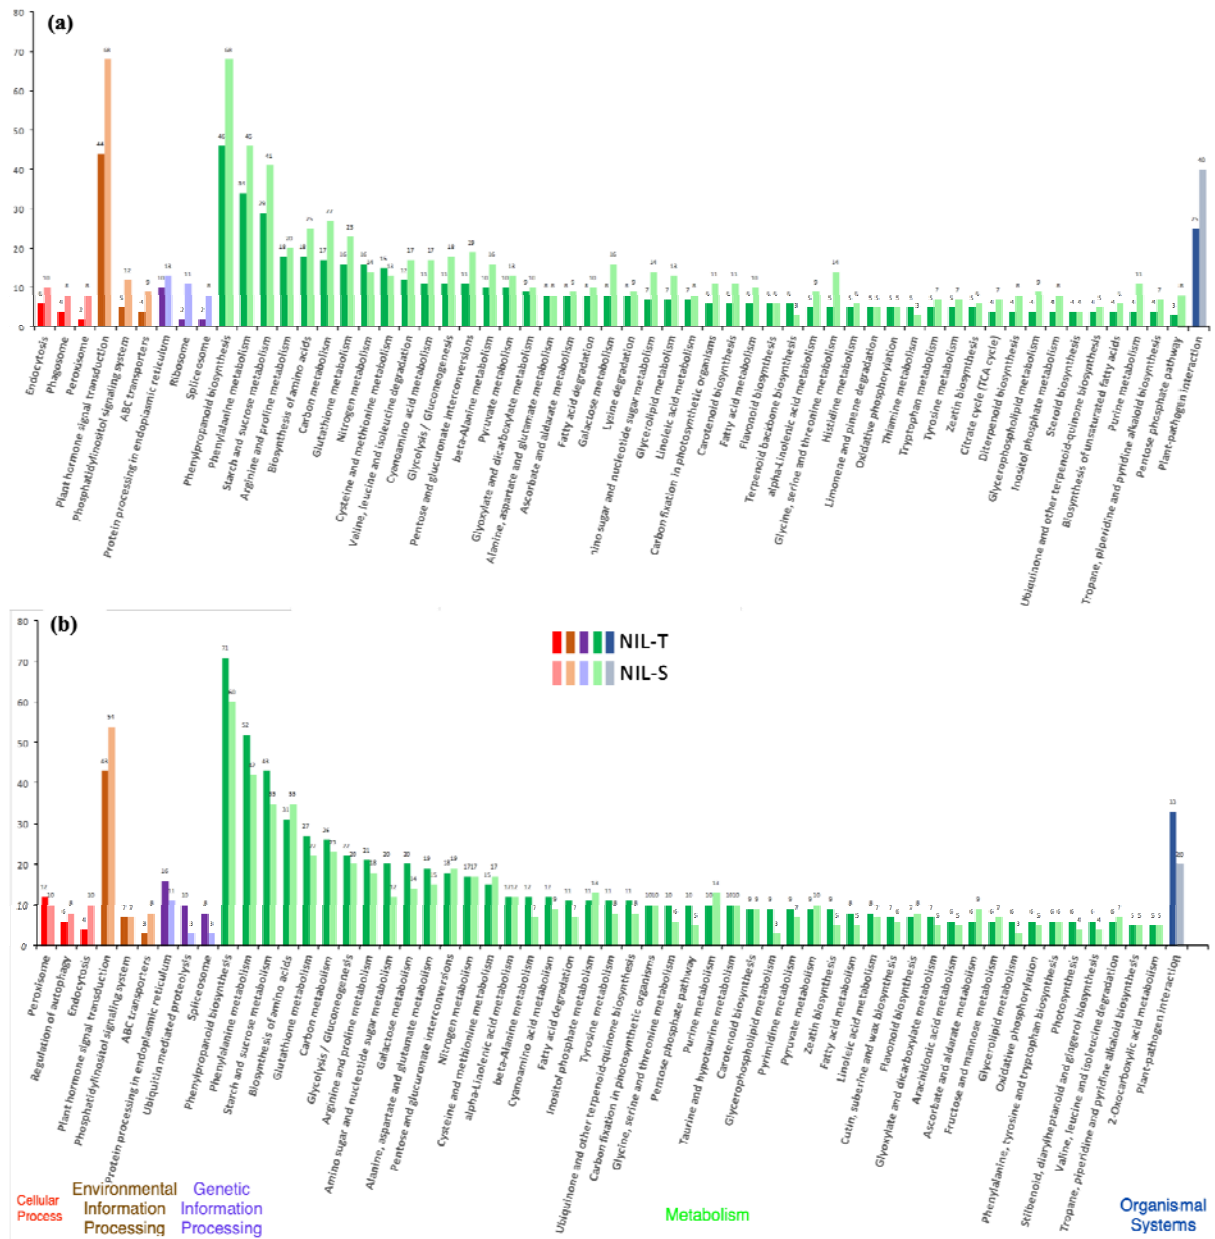

50

51 **Fig. 4. Significantly enriched KEGG (Kyoto Encyclopedia of Genes and Genomes) of all**  
 52 **DEGs between salt-stressed and control samples in NIL-T and NIL-S soybeans. a** 6h  
 53 **KEGG enrichment. b** 3d KEGG enrichment. KEGG enrichment  $P$ -value cut-off  $\leq 0.05$ .

54

55

56

57

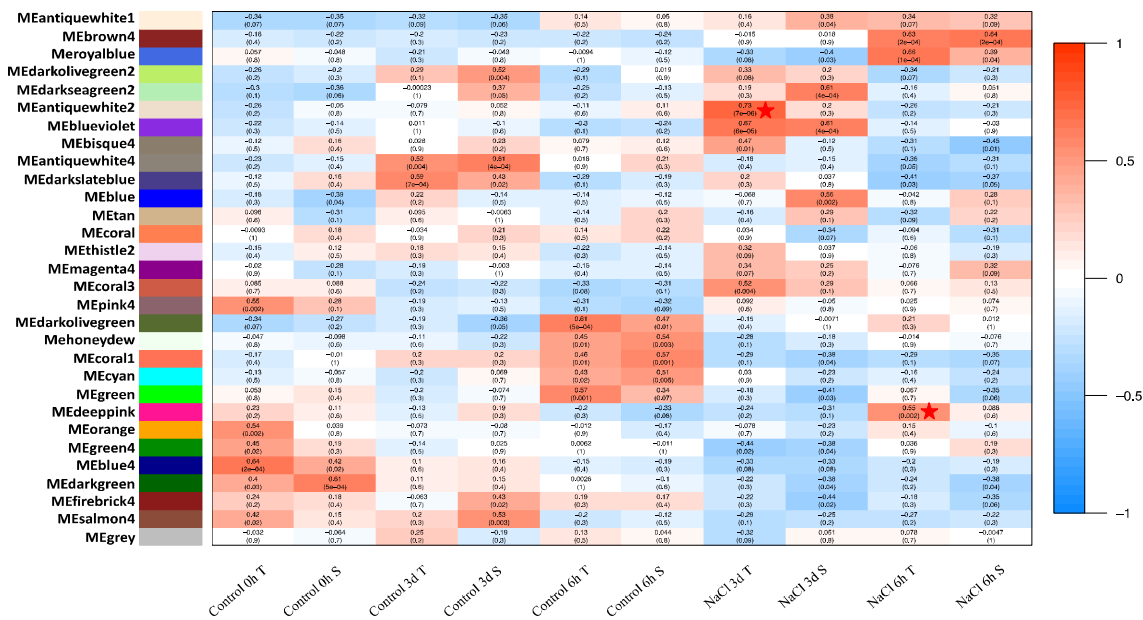

58

59 **Fig. 5 Module - Trait Relationships (MTRs) and corresponding *p*-values (within**  
 60 **brackets) between the detected modules on the y-axis and groups (trait) on the x-axis.**

61 The MTRs are coloured based on their correlation: from red (strong positive correlation) to  
 62 blue (strong negative correlation). Each group contains three biological replicates. Pentagram  
 63 represents modules of interest.

64

65

66

67

68

69

70

71

72

73

74

75

76

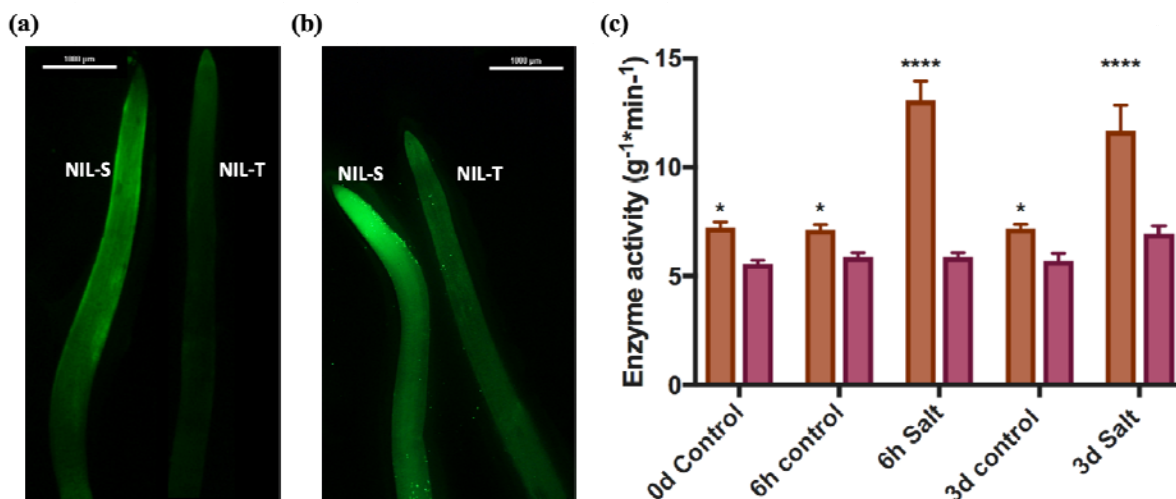

77

78 **Fig. 6 Relative ROS concentrations and enzyme activity of the superoxide anion (O<sub>2</sub><sup>-</sup>)**  
79 **scavenger assay in soybean roots.** NIL-T and NIL-S were labelled with 30 μM DCFDA for  
80 10 min under control conditions (a) and with salt treatment for 3 days (b). Green fluorescence  
81 indicates the presence of ROS. (c) scavenging activity of the superoxide anion (O<sub>2</sub><sup>-</sup>) of NIL-T  
82 (brown) and NIL-S (red) with or without salt treatment. Asterisk indicates a significant  
83 difference between NIL-T and NIL-S at \*P < 0.05 \*\*\*\*P < 0.0001.

84

85

86

87

88

89

90

91

92

93

94

95

96

97

98

99

100 **Table 1. Reads mapping and quality of sequencing for 30 *Glycine max* root samples.**

| Group | Sample        | Total Reads | Mapped Reads        | Clean reads | Clean bases    | GC Content | %≥Q30  |
|-------|---------------|-------------|---------------------|-------------|----------------|------------|--------|
| g1    | Control 0h T1 | 57,699,406  | 49,137,608 (85.16%) | 28,849,703  | 7,212,425,750  | 50.56%     | 92.05% |
|       | Control 0h T2 | 59,769,628  | 51,025,677 (85.37%) | 29,884,814  | 7,471,203,500  | 52.37%     | 93.30% |
|       | Control 0h T3 | 62,070,060  | 53,862,681 (86.78%) | 31,035,030  | 7,758,757,500  | 50.01%     | 93.35% |
| g2    | Control 0h S1 | 43,642,298  | 32,134,039 (73.63%) | 21,821,149  | 5,455,287,250  | 48.70%     | 88.44% |
|       | Control 0h S2 | 46,423,344  | 39,574,288 (85.25%) | 23,211,672  | 5,802,918,000  | 49.23%     | 94.08% |
|       | Control 0h S3 | 56,017,714  | 43,638,938 (77.90%) | 28,008,857  | 7,002,214,250  | 50.34%     | 93.88% |
| g3    | Control 3d T1 | 48,501,908  | 42,642,939 (87.92%) | 24,250,954  | 6,062,738,500  | 48.90%     | 93.69% |
|       | Control 3d T2 | 60,432,732  | 53,220,906 (88.07%) | 30,216,366  | 7,554,091,500  | 50.86%     | 94.28% |
|       | Control 3d T3 | 48,809,732  | 41,680,164 (85.39%) | 24,404,866  | 6,101,216,500  | 48.29%     | 92.51% |
| g4    | Control 3d S1 | 47,058,528  | 39,937,443 (84.87%) | 23,529,264  | 5,882,316,000  | 48.39%     | 93.58% |
|       | Control 3d S2 | 48,461,144  | 40,928,669 (84.46%) | 24,230,572  | 6,057,643,000  | 47.83%     | 94.18% |
|       | Control 3d S3 | 49,796,814  | 40,986,303 (82.31%) | 24,898,407  | 6,224,601,750  | 50.35%     | 94.30% |
| g5    | Control 6h T1 | 51,648,018  | 30,700,905 (59.44%) | 25,824,009  | 6,456,002,250  | 48.37%     | 84.72% |
|       | Control 6h T2 | 34,427,522  | 21,774,315 (63.25%) | 17,213,761  | 4,303,440,250  | 48.21%     | 87.04% |
|       | Control 6h T3 | 84,627,144  | 55,643,274 (65.75%) | 42,313,572  | 10,578,393,000 | 48.00%     | 86.74% |
| g6    | Control 6h S1 | 62,158,510  | 50,330,267 (80.97%) | 31,079,255  | 7,769,813,750  | 48.61%     | 92.06% |
|       | Control 6h S2 | 59,768,732  | 44,180,997 (73.92%) | 29,884,366  | 7,471,091,500  | 48.12%     | 89.44% |
|       | Control 6h S3 | 48,852,622  | 41,445,404 (84.84%) | 24,426,311  | 6,106,577,750  | 49.05%     | 93.76% |
| g7    | NaCl 3d T1    | 47,478,210  | 39,318,129 (82.81%) | 23,739,105  | 5,934,776,250  | 49.12%     | 93.71% |
|       | NaCl 3d T2    | 49,524,852  | 42,007,601 (84.82%) | 24,762,426  | 6,190,606,500  | 50.44%     | 94.94% |
|       | NaCl 3d T3    | 53,918,342  | 45,880,121 (85.09%) | 26,959,171  | 6,739,792,750  | 52.93%     | 93.81% |
| g8    | NaCl 3d S1    | 55,228,034  | 45,771,588 (82.88%) | 27,614,017  | 6,903,504,250  | 47.24%     | 92.28% |
|       | NaCl 3d S2    | 57,398,436  | 46,291,922 (80.65%) | 28,699,218  | 7,174,804,500  | 48.58%     | 92.30% |
|       | NaCl 3d S3    | 58,773,304  | 47,497,496 (80.81%) | 29,386,652  | 7,346,663,000  | 48.48%     | 91.31% |
| g9    | NaCl 6h T1    | 53,174,654  | 45,735,099 (86.01%) | 26,587,327  | 6,646,831,750  | 51.47%     | 93.56% |
|       | NaCl 6h T2    | 52,045,484  | 43,779,481 (84.12%) | 26,022,742  | 6,505,685,500  | 50.75%     | 93.30% |
|       | NaCl 6h T3    | 55,579,826  | 45,167,976 (81.27%) | 27,789,913  | 6,947,478,250  | 51.54%     | 92.62% |
| g10   | NaCl 6h S1    | 54,197,662  | 45,095,587 (83.21%) | 27,098,831  | 6,774,707,750  | 48.34%     | 92.64% |
|       | NaCl 6h S2    | 53,274,670  | 45,180,893 (84.81%) | 26,637,335  | 6,659,333,750  | 50.44%     | 92.49% |
|       | NaCl 6h S3    | 47,601,546  | 40,826,998 (85.77%) | 23,800,773  | 5,950,193,250  | 48.16%     | 94.75% |

101

102

103

104

105

106

107

108

109

110

111

112

113

114

115

116

117 **Table 2. GO term analysis of uniquely up- and down-regulated genes under salt**  
 118 **treatment in soybean roots at 6h.** (a) Up-regulated genes in NIL-T soybean roots. (b) Up-  
 119 regulated genes in NIL-S soybean roots. (c) Down-regulated genes in NIL-T soybean roots.  
 120 (d) Down-regulated genes in NIL-S soybean roots. CC, Cellular Component; BP, Biological  
 121 Process; MF, Molecular Function.

(a)

| GO term    | Ontology | Description                      | Number in input list | Number in BG/Ref | p-value | FDR     |
|------------|----------|----------------------------------|----------------------|------------------|---------|---------|
| GO:0009607 | BP       | response to biotic stimulus      | 7                    | 64               | 9.3e-08 | 2.4e-05 |
| GO:0006952 | BP       | defense response                 | 7                    | 118              | 4.4e-06 | 0.00056 |
| GO:0055114 | BP       | oxidation reduction              | 28                   | 2408             | 6.1e-05 | 0.0051  |
| GO:0005507 | MF       | copper ion binding               | 9                    | 219              | 3.4e-06 | 0.00071 |
| GO:0016491 | MF       | oxidoreductase activity          | 32                   | 2744             | 1.5e-05 | 0.0016  |
| GO:0004866 | MF       | endopeptidase inhibitor activity | 5                    | 92               | 0.00016 | 0.0083  |

(b)

| GO term    | Ontology | Description                                | Number in input list | Number in BG/Ref | p-value | FDR    |
|------------|----------|--------------------------------------------|----------------------|------------------|---------|--------|
| GO:0006355 | BP       | regulation of transcription, DNA-dependent | 69                   | 1874             | 2e-05   | 0.0016 |

(c)

| GO term    | Ontology | Description          | Number in input list | Number in BG/Ref | p-value | FDR    |
|------------|----------|----------------------|----------------------|------------------|---------|--------|
| GO:0016021 | CC       | integral to membrane | 11                   | 1419             | 0.00065 | 0.0058 |

(d)

| GO term    | Ontology | Description                               | Number in input list | Number in BG/Ref | p-value | FDR   |
|------------|----------|-------------------------------------------|----------------------|------------------|---------|-------|
| GO:0020037 | MF       | heme binding                              | 23                   | 728              | 8e-05   | 0.012 |
| GO:0009055 | MF       | electron carrier activity                 | 21                   | 702              | 0.00033 | 0.018 |
| GO:0004190 | MF       | aspartic-type endopeptidase activity      | 9                    | 169              | 0.00042 | 0.018 |
| GO:0015035 | MF       | protein disulfide oxidoreductase activity | 7                    | 96               | 0.00031 | 0.018 |

122

123

124 **Table 3. GO term analysis of uniquely up- and down-regulated genes under salt**  
 125 **treatment in soybean roots at 3d.** (a) Up-regulated genes in NIL-T soybean roots. (b) Up-  
 126 regulated genes in NIL-S soybean roots. (c) Down-regulated genes in NIL-T soybean roots.  
 127 (d) Down-regulated genes in NIL-S soybean roots. CC, Cellular Component; BP, Biological  
 128 Process; MF, Molecular Function.

(a)

| GO term    | Ontology | Description             | Number in input list | Number in BG/Ref | p-value | FDR    |
|------------|----------|-------------------------|----------------------|------------------|---------|--------|
| GO:0055114 | BP       | oxidation reduction     | 53                   | 2408             | 8.9e-06 | 0.0037 |
| GO:0016491 | MF       | oxidoreductase activity | 57                   | 2744             | 2e-05   | 0.0073 |

(b)

| GO term    | Ontology | Description                                | Number in input list | Number in BG/Ref | p-value | FDR     |
|------------|----------|--------------------------------------------|----------------------|------------------|---------|---------|
| GO:0006355 | BP       | regulation of transcription, DNA-dependent | 51                   | 1874             | 9.8e-08 | 3.6e-06 |
| GO:0006468 | BP       | protein amino acid phosphorylation         | 45                   | 2356             | 0.002   | 0.023   |
| GO:0048544 | BP       | recognition of pollen                      | 14                   | 135              | 3.8e-09 | 3e-07   |
| GO:0015743 | BP       | malate transport                           | 5                    | 34               | 0.0001  | 0.0013  |

(c)

| GO term    | Ontology | Description                 | Number in input list | Number in BG/Ref | p-value | FDR     |
|------------|----------|-----------------------------|----------------------|------------------|---------|---------|
| GO:0007018 | BP       | microtubule-based movement  | 17                   | 155              | 9.8e-09 | 5.2e-06 |
| GO:0003777 | MF       | microtubule motor activity  | 17                   | 155              | 9.8e-09 | 2.4e-06 |
| GO:0043531 | MF       | ADP binding                 | 27                   | 467              | 2.1e-07 | 2e-05   |
| GO:0004565 | MF       | beta-galactosidase activity | 6                    | 37               | 9.5e-05 | 0.0031  |
| GO:0017171 | MF       | serine hydrolase activity   | 17                   | 330              | 0.00014 | 0.0041  |
| GO:0009341 | CC       | beta-galactosidase complex  | 6                    | 37               | 9.5e-05 | 0.009   |

(d)

| GO term    | Ontology | Description                        | Number in input list | Number in BG/Ref | p-value | FDR    |
|------------|----------|------------------------------------|----------------------|------------------|---------|--------|
| GO:0055085 | BP       | transmembrane transport            | 29                   | 1167             | 1.9e-05 | 0.0075 |
| GO:0022857 | MF       | transmembrane transporter activity | 24                   | 1020             | 0.00022 | 0.036  |

129

130 **Table 4. Up-regulated genes in oxidation reduction and oxidoreductase activity GO**  
 131 **terms of 3 days salt-treated NIL-T roots. Annotations are achieved from**  
 132 **<https://www.soybase.org/genomeannotation/>.**  
 133

| Gene ID         | Control (FPKM) | NaCl (FPKM) | PFAM Descriptions                                                       | Pathway Descriptions                       | KOG Descriptions                                 |
|-----------------|----------------|-------------|-------------------------------------------------------------------------|--------------------------------------------|--------------------------------------------------|
| Glyma.13G104100 | 0.003926       | 1.178719    | Flavin(ribo)flavin(ribo)oxidoreductase                                  | AMINODEHYDROGENASE                         | Flavin-containing amine oxidase                  |
| Glyma.01G21400  | 0.202688       | 2.578000    | alpha/betaC-terminal domain of lactate/malate dehydrogenase             | MALATE/DEHYDROGENASE                       | Lactate dehydrogenase                            |
| Glyma.11G024100 | 0.040890       | 1.424517    | Glutathione peroxidase                                                  | GLUTATHIONE PEROXIDASE                     | Glutathione peroxidase                           |
| Glyma.13G173500 | 71.332430      | 279.415321  | Cytochrome P450                                                         | FAMILY/CT/IN/AMED                          | Cytochrome_P450_CYP2_subfamily                   |
| Glyma.02G202500 | 0.297011       | 0.974227    | Aldehyde dehydrogenase family                                           | ALDEHYDE DEHYDROGENASE-RELATED             | Aldehyde dehydrogenase                           |
| Glyma.18G211000 | 1.807171       | 5.575661    | Peroxidase                                                              | NA                                         | NA                                               |
| Glyma.16G179200 | 1.462350       | 2.127147    | CobQ/CobB/MinD/ParA/nucleoid-binding domain                             | FAMILY/CT/IN/AMED                          | Predicted_ATPase_nucleotide-binding              |
| Glyma.06G137000 | 0.370532       | 1.164678    | 20G-FeII/III/IV superfamily                                             | OMD REDUCTASE/20G-FEII/III/IV/GENASEFAMILY | Iron/ascorbate family oxidoreductases            |
| Glyma.14G099000 | 3.113720       | 7.206253    | Cytokinin dehydrogenase                                                 | D-LACTATE DEHYDROGENASE                    | Proteins containing the FAD binding domain       |
| Glyma.16G021200 | 6.619380       | 14.499433   | Cytochrome P450                                                         | FAMILY/CT/IN/AMED                          | Cytochrome_P450_CYP2_subfamily                   |
| Glyma.05G214000 | 27.504467      | 64.849500   | NAD-binding domain of phosphoenolpyruvate dehydrogenase                 | 6-PHOSPHOGLUCONATE DEHYDROGENASE           | 6-phosphoenolpyruvate dehydrogenase              |
| Glyma.11G175900 | 6.988560       | 13.550913   | Cytochrome P450                                                         | FAMILY/CT/IN/AMED                          | Cytochrome_P450_CYP19/CYP26_subfamily            |
| Glyma.17G225700 | 1.988862       | 5.125208    | FAD-binding domain of cytokinin dehydrogenase                           | D-LACTATE DEHYDROGENASE                    | Proteins containing the FAD binding domain       |
| Glyma.04G123800 | 1.602680       | 3.730430    | Alternantherinase                                                       | NA                                         | NA                                               |
| Glyma.19G123800 | 0.464332       | 1.785490    | Rubryerythrin                                                           | NA                                         | NA                                               |
| Glyma.08G303800 | 6.717425       | 16.957918   | Flavin(ribo)flavin(ribo)oxidoreductase                                  | AMINODEHYDROGENASE                         | Amine oxidase                                    |
| Glyma.07G168500 | 10.873917      | 21.774467   | 20G-FeII/III/IV superfamily                                             | OMD REDUCTASE/20G-FEII/III/IV/GENASEFAMILY | Iron/ascorbate family oxidoreductases            |
| Glyma.09G123000 | 0.903153       | 1.607179    | CobQ/CobB/MinD/ParA/nucleoid-binding domain                             | FAMILY/CT/IN/AMED                          | Predicted_ATPase_nucleotide-binding              |
| Glyma.01G056100 | 0.352756       | 0.825044    | 20G-FeII/III/IV superfamily                                             | OMD REDUCTASE/20G-FEII/III/IV/GENASEFAMILY | Iron/ascorbate family oxidoreductases            |
| Glyma.18G177000 | 3.020740       | 6.342210    | Zinc-binding dehydrogenase                                              | ALCOHOL DEHYDROGENASE-RELATED              | Alcohol dehydrogenase class VII                  |
| Glyma.03G081000 | 0.296423       | 0.491798    | Cytochrome P450                                                         | FAMILY/CT/IN/AMED                          | Cytochrome_P450_CYP19/CYP26_subfamily            |
| Glyma.05G041200 | 0.141178       | 0.587665    | Ferric chelate dehydrogenase                                            | NADPH DEHYDROGENASE                        | NA                                               |
| Glyma.03G098600 | 3.067300       | 7.794463    | Zinc-binding dehydrogenase                                              | ALCOHOL DEHYDROGENASE-RELATED              | Predicted_NAD-dependent oxidoreductase           |
| Glyma.17G167200 | 3.871524       | 8.781803    | FAD-dependent oxidoreductase                                            | FAD/NAD(BINDING) OXIDOREDUCTASES           | Possible oxidoreductase                          |
| Glyma.17G054500 | 0.337715       | 0.774757    | FAD-binding domain of cytokinin dehydrogenase                           | GULONOLACTONED HYDROGENASE                 | Proteins containing the FAD binding domain       |
| Glyma.03G122000 | 26.622288      | 34.893184   | Cytochrome P450                                                         | FAMILY/CT/IN/AMED                          | Cytochrome_P450_CYP2_subfamily                   |
| Glyma.20G169200 | 30.464700      | 53.630300   | Peroxidase                                                              | NA                                         | NA                                               |
| Glyma.11G185700 | 6.944571       | 9.682720    | Cytochrome P450                                                         | FAMILY/CT/IN/AMED                          | Cytochrome_P450_CYP19/CYP26_subfamily            |
| Glyma.06G113500 | 0.626838       | 1.859539    | Phenophorbide oxygenase                                                 | IRON-SULFUR DOMAIN CONTAINING PROTEIN      | NA                                               |
| Glyma.15G071000 | 14.283107      | 37.916700   | Polypheboric acid oxygenase                                             | TYROSINASE                                 | NA                                               |
| Glyma.10G231200 | 6.984682       | 11.091238   | Fatty acid hydroxylase superfamily                                      | NA                                         | NA                                               |
| Glyma.10G208600 | 1.982207       | 2.714087    | Cytochrome P450                                                         | FAMILY/CT/IN/AMED                          | Cytochrome_P450_CYP2_subfamily                   |
| Glyma.15G129200 | 8.062880       | 21.633733   | Peroxidase                                                              | NA                                         | NA                                               |
| Glyma.13G168700 | 4.582661       | 11.779662   | Catalytic domain of D-isomer-specific dehydroxyacetone dehydrogenase    | 2-HYDROXYACETONE DEHYDROGENASE-RELATED     | Glyoxylate hydroxypyruvate reductase [D-isomer-] |
| Glyma.10G041800 | 0.537806       | 1.160858    | Flavin-binding iron oxygenase-like                                      | DIMETHYLANILINE MONOOXYGENASE              | Flavin-containing monooxygenase                  |
| Glyma.17G015400 | 4.400850       | 6.387743    | Cytochrome P450                                                         | FAMILY/CT/IN/AMED                          | Cytochrome_P450_CYP2_subfamily                   |
| Glyma.19G126000 | 35.728733      | 46.534900   | Cytochrome P450                                                         | FAMILY/CT/IN/AMED                          | Cytochrome_P450_CYP2_subfamily                   |
| Glyma.02G052700 | 14.152725      | 29.022581   | Peroxidase                                                              | NA                                         | NA                                               |
| Glyma.09G218700 | 1.588015       | 2.484951    | High-affinity nickel transport protein                                  | NA                                         | NA                                               |
| Glyma.06G017900 | 12.309302      | 24.021127   | Catalase                                                                | CATALASE                                   | Catalase                                         |
| Glyma.12G107000 | 7.262499       | 15.171104   | Pyridine nucleotide-dependent dehydrogenase                             | NA/DHDEHYDROGENASE-RELATED                 | NADH-dehydrogenase (ubiquinone)                  |
| Glyma.11G149000 | 0.525827       | 1.166289    | FAD-binding domain of cytokinin dehydrogenase                           | GULONOLACTONED HYDROGENASE                 | Proteins containing the FAD binding domain       |
| Glyma.20G192200 | 0.855669       | 1.672531    | Lactate/malate dehydrogenase                                            | MALATE DEHYDROGENASE                       | Malate dehydrogenase                             |
| Glyma.18G009700 | 43.848325      | 61.982450   | Glycerate dehydrogenase                                                 | GLYCERALDEHYDE 3-PHOSPHATE                 | Glycerate dehydrogenase                          |
| Glyma.05G302700 | 12.621352      | 25.677657   | Peroxidase                                                              | NA                                         | NA                                               |
| Glyma.11G122700 | 29.647954      | 57.788974   | Cytochrome P450                                                         | FAMILY/CT/IN/AMED                          | Cytochrome_P450_CYP19/CYP26_subfamily            |
| Glyma.05G207100 | 36.391806      | 78.784041   | Glutathione peroxidase                                                  | GLUTATHIONE PEROXIDASE                     | Glutathione peroxidase                           |
| Glyma.08G033400 | 19.221367      | 37.310567   | NAD-binding domain of phosphoenolpyruvate dehydrogenase                 | 3-HYDROXYISOBUTYRATE DEHYDROGENASE         | Predicted dehydrogenase                          |
| Glyma.02G183100 | 0.857535       | 1.409998    | FAD-dependent oxidoreductase                                            | GLYCEROL-3-PHOSPHATE DEHYDROGENASE         | Glycerol-3-phosphate dehydrogenase               |
| Glyma.02G149900 | 1.938657       | 3.676737    | 20G-FeII/III/IV superfamily                                             | NA                                         | Uncharacterized conserved protein                |
| Glyma.08G226600 | 1.013831       | 1.571265    | Complex III intermediate-associated protein (CIQA30) [NmrA-like family] | NA/D-DEPENDENT EPIMERASE/DEHYDRATASE       | Predicted dehydrogenase                          |
| Glyma.14G205200 | 91.015528      | 123.588510  | Cytochrome P450                                                         | FAMILY/CT/IN/AMED                          | Cytochrome_P450_CYP2_subfamily                   |
| Glyma.15G019300 | 25.004079      | 62.218292   | Malic enzyme, N-terminal domain                                         | MALIC ENZYME-RELATED                       | NADP-dependent malic enzyme                      |

134

135

136

137

138

139

140

141

142

143

144

145

146

147

148 **Table 5 Significant Gene Ontology (GO) terms in MEdeppink and MEantiquewhite2**  
149 **modules.** (a) Enriched GO terms in MEdeppink module (NIL-T after 6h salt treatment); (b)  
150 Enriched GO terms in MEantiquewhite2 module (NIL-T after 3d salt treatment). C, Cellular  
151 Component; P, Biological Process; F, Molecular Function.

**(a)**

| GO term    | Ontology | Description           | Number in input list | Number in BG/Ref | p-value  | FDR      |
|------------|----------|-----------------------|----------------------|------------------|----------|----------|
| GO:005886  | C        | plasma membrane       | 12                   | 81               | 5.00E-20 | 1.70E-18 |
| GO:0031224 | C        | intrinsic to membrane | 12                   | 1453             | 4.40E-06 | 4.90E-05 |
| GO:0016021 | C        | Integral to membrane  | 12                   | 1419             | 3.50E-06 | 4.90E-05 |
| GO:0044425 | C        | membrane part         | 13                   | 1801             | 7.00E-06 | 5.80E-05 |
| GO:0016020 | C        | membrane              | 15                   | 3518             | 0.00053  | 0.0035   |

**(b)**

| GO term    | Ontology | Description                                          | Number in input list | Number in BG/Ref | p-value  | FDR     |
|------------|----------|------------------------------------------------------|----------------------|------------------|----------|---------|
| GO:0009207 | P        | purine ribonucleoside triphosphate catabolic process | 6                    | 40               | 0.000092 | 0.00044 |
| GO:0046907 | P        | intracellular transport                              | 14                   | 297              | 0.000073 | 0.00044 |
| GO:0016567 | P        | protein ubiquitination                               | 9                    | 130              | 0.000019 | 0.00076 |
| GO:0046034 | P        | ATP metabolic process                                | 5                    | 46               | 0.00021  | 0.0046  |
| GO:0046578 | P        | regulation of Ras protein signal transduction        | 6                    | 91               | 0.00061  | 0.011   |
| GO:0004674 | F        | protein serine/threonine kinase activity             | 14                   | 39               | 3.1E-16  | 1.2E-13 |
| GO:0046872 | F        | metal ion binding                                    | 65                   | 3600             | 0.000024 | 0.0021  |
| GO:0042623 | F        | ATPase activity, coupled                             | 12                   | 343              | 0.00047  | 0.021   |
| GO:0030120 | C        | vesicle coat                                         | 5                    | 41               | 0.00013  | 0.0013  |
| GO:0031981 | C        | nuclear lumen                                        | 5                    | 105              | 0.0066   | 0.039   |
| GO:0016021 | C        | integral to membrane                                 | 26                   | 1419             | 0.0068   | 0.039   |

152  
153  
154  
155  
156  
157  
158  
159  
160  
161  
162  
163
